# Supplementary material for: Single-Cell Transcriptomes Reveal Characteristic Features of Mouse Hepatocytes with Liver Cholestatic Injury
Source: MDPI journal article supplement (doi:10.3390/cells8091069), 2019-09-11
Supplement: s1 [file s1]

Single-cell transcriptomes reveal characteristic features of Mouse Hepatocytes with Cholestasis Injury

Na Chang, Lei Tian, Xiaofang Ji, Xuan Zhou, Lei Hou, Xinhao Zhao, Yuanru Yang, Lin Yang, Liying Li

Supplemental Table 4: High expressed genes of BDL-2-5 (Related to Figure 6-7)

Top 30 highly expressed genes in BDL-2, BDL-3, and BDL-5:

| EnsemblID          | GeneName | Cluster 1<br>Average | Cluster 1<br>Log2 Fold<br>Change | Cluster 1<br>P-Value | Cluster 2<br>Average | Cluster 2<br>Log2 Fold<br>Change | Cluster 2<br>P-Value | Cluster 3<br>Average | Cluster 3<br>Log2 Fold<br>Change | Cluster 3<br>P-Value | Cluster 4<br>Average | Cluster 4<br>Log2 Fold<br>Change | Cluster 4<br>P-Value | Cluster 5<br>Average | Cluster 5<br>Log2 Fold<br>Change | Cluster 5<br>P-Value | Cluster 6<br>Average | Cluster 6<br>Log2 Fold<br>Change | Cluster 6<br>P-Value |
|--------------------|----------|----------------------|----------------------------------|----------------------|----------------------|----------------------------------|----------------------|----------------------|----------------------------------|----------------------|----------------------|----------------------------------|----------------------|----------------------|----------------------------------|----------------------|----------------------|----------------------------------|----------------------|
| ENSMUSG00000098188 | Sowahc   | 0.13                 | -2.48                            | 2.19E-07             | 2.01                 | 2.14                             | 7.57E-05             | 0.91                 | 0.73                             | 1.51E-01             | 0.29                 | -1.21                            | 7.26E-02             | 0.6                  | -0.06                            | 1.00E+00             | 0.33                 | -1                               | 1.12E-01             |
| ENSMUSG00000040724 | Kcna2    | 0.02                 | -5.17                            | 4.94E-17             | 1.83                 | 2.1                              | 7.57E-05             | 1.23                 | 1.52                             | 1.03E-04             | 0.06                 | -3.5                             | 3.65E-07             | 0.56                 | -0.05                            | 1.00E+00             | 0.25                 | -1.36                            | 2.17E-02             |
| ENSMUSG00000005413 | Hmox1    | 0.61                 | -3.92                            | 7.48E-15             | 22.77                | 2.04                             | 1.51E-04             | 10.99                | 0.75                             | 1.63E-01             | 3.1                  | -1.4                             | 3.38E-02             | 8.96                 | 0.35                             | 7.46E-01             | 4.1                  | -0.97                            | 1.07E-01             |
| ENSMUSG00000060044 | Tmem26   | 0.03                 | -4.02                            | 1.24E-12             | 1.35                 | 2.03                             | 1.20E-04             | 0.83                 | 1.24                             | 2.80E-03             | 0.05                 | -3.34                            | 1.77E-06             | 0.55                 | 0.4                              | 6.37E-01             | 0.18                 | -1.43                            | 1.69E-02             |
| ENSMUSG00000032915 | Adgre4   | 0.07                 | -4.39                            | 9.34E-18             | 3.89                 | 1.97                             | 7.57E-05             | 1.9                  | 0.7                              | 1.47E-01             | 0.44                 | -1.73                            | 2.91E-03             | 1.93                 | 0.71                             | 1.49E-01             | 0.65                 | -1.13                            | 4.70E-02             |
| ENSMUSG00000035448 | Ccr3     | 0.02                 | -4.55                            | 3.15E-11             | 1.12                 | 1.96                             | 1.34E-03             | 0.73                 | 1.32                             | 5.99E-03             | 0.11                 | -1.95                            | 1.19E-02             | 0.44                 | 0.26                             | 8.62E-01             | 0.13                 | -1.62                            | 2.30E-02             |
| ENSMUSG00000022181 | C6       | 1.02                 | -1.95                            | 2.37E-06             | 9.8                  | 1.95                             | 7.57E-05             | 5.87                 | 1.1                              | 4.65E-03             | 0.41                 | -3.23                            | 1.85E-08             | 3.48                 | 0.08                             | 1.00E+00             | 1.63                 | -1.16                            | 2.92E-02             |
| ENSMUSG00000064225 | Paqr9    | 0.35                 | -2.1                             | 8.44E-07             | 3.7                  | 1.93                             | 7.57E-05             | 2.1                  | 0.97                             | 1.62E-02             | 0.23                 | -2.66                            | 4.30E-06             | 1.59                 | 0.41                             | 5.50E-01             | 0.51                 | -1.47                            | 5.47E-03             |
| ENSMUSG00000044206 | Vsig4    | 0.62                 | -4.53                            | 2.61E-22             | 32.97                | 1.88                             | 1.23E-04             | 22.88                | 1.36                             | 1.85E-04             | 1.79                 | -2.89                            | 1.98E-07             | 14.23                | 0.38                             | 6.35E-01             | 4.52                 | -1.51                            | 1.66E-03             |
| ENSMUSG00000022103 | Gfra2    | 0.02                 | -4.38                            | 6.42E-14             | 1.27                 | 1.86                             | 6.12E-04             | 0.8                  | 1.13                             | 7.61E-03             | 0.04                 | -3.66                            | 3.07E-07             | 0.68                 | 0.76                             | 1.51E-01             | 0.19                 | -1.36                            | 2.43E-02             |
| ENSMUSG00000015354 | Pcolce2  | 0.04                 | -4.61                            | 8.26E-17             | 2.24                 | 1.86                             | 3.44E-04             | 1.55                 | 1.32                             | 6.82E-04             | 0.06                 | -3.84                            | 1.22E-08             | 1.09                 | 0.58                             | 3.31E-01             | 0.31                 | -1.48                            | 8.51E-03             |
| ENSMUSG00000025743 | Sdc3     | 0.65                 | -4.65                            | 1.05E-23             | 36.5                 | 1.82                             | 1.94E-04             | 20.57                | 0.85                             | 4.39E-02             | 4.81                 | -1.61                            | 1.75E-03             | 17.5                 | 0.52                             | 3.90E-01             | 8.27                 | -0.77                            | 1.57E-01             |
| ENSMUSG00000028917 | Plekhn2  | 0.16                 | -2.42                            | 1.43E-07             | 1.87                 | 1.74                             | 9.36E-04             | 1.09                 | 0.83                             | 6.80E-02             | 0.45                 | -0.73                            | 3.73E-01             | 0.65                 | -0.13                            | 1.00E+00             | 0.48                 | -0.62                            | 3.97E-01             |
| ENSMUSG00000030830 | Itgal    | 0.17                 | -4.1                             | 2.54E-18             | 6.34                 | 1.74                             | 6.12E-04             | 3.84                 | 0.92                             | 2.84E-02             | 1.17                 | -1.14                            | 5.75E-02             | 3.19                 | 0.54                             | 3.36E-01             | 1.15                 | -1.18                            | 2.61E-02             |
| ENSMUSG00000026390 | Marco    | 0.12                 | -4.76                            | 5.23E-12             | 7.09                 | 1.7                              | 2.37E-02             | 3.24                 | 0.33                             | 7.76E-01             | 1.2                  | -1.31                            | 1.92E-01             | 4.8                  | 1.08                             | 8.60E-02             | 1.69                 | -0.78                            | 4.77E-01             |
| ENSMUSG00000004359 | Spic     | 0.02                 | -4.78                            | 5.01E-15             | 1.14                 | 1.68                             | 2.44E-03             | 0.76                 | 1.05                             | 1.61E-02             | 0.17                 | -1.49                            | 2.34E-02             | 0.59                 | 0.52                             | 4.56E-01             | 0.26                 | -0.85                            | 2.11E-01             |
| ENSMUSG00000063193 | Cd300lb  | 0.02                 | -4.59                            | 4.56E-15             | 1.16                 | 1.65                             | 2.23E-03             | 0.74                 | 0.94                             | 3.43E-02             | 0.53                 | 0.27                             | 7.59E-01             | 0.42                 | -0.13                            | 1.00E+00             | 0.18                 | -1.45                            | 1.26E-02             |
| ENSMUSG00000013089 | Etv5     | 0.07                 | -2.85                            | 4.26E-09             | 1.15                 | 1.63                             | 2.30E-03             | 0.62                 | 0.56                             | 3.25E-01             | 0.21                 | -1.22                            | 6.03E-02             | 0.63                 | 0.58                             | 3.34E-01             | 0.35                 | -0.43                            | 6.42E-01             |
| ENSMUSG00000070873 | Lilra5   | 0.04                 | -4.78                            | 1.03E-18             | 2.21                 | 1.6                              | 2.17E-03             | 1.79                 | 1.4                              | 1.67E-04             | 0.47                 | -1.02                            | 1.21E-01             | 1.01                 | 0.24                             | 8.30E-01             | 0.33                 | -1.58                            | 3.12E-03             |
| ENSMUSG00000034641 | Cd300ld  | 0.1                  | -4.59                            | 1.40E-20             | 4.92                 | 1.56                             | 2.17E-03             | 4.05                 | 1.39                             | 1.56E-04             | 0.94                 | -1.23                            | 3.84E-02             | 2.36                 | 0.29                             | 7.46E-01             | 0.85                 | -1.39                            | 7.47E-03             |
| ENSMUSG00000014542 | Clec4f   | 1.24                 | -4.37                            | 2.54E-21             | 49.89                | 1.54                             | 3.02E-03             | 45.98                | 1.64                             | 4.39E-06             | 3.17                 | -2.91                            | 1.81E-07             | 25.66                | 0.39                             | 6.18E-01             | 8.19                 | -1.5                             | 1.98E-03             |
| ENSMUSG00000072596 | Ear2     | 0.05                 | -4.15                            | 2.35E-14             | 1.66                 | 1.33                             | 2.43E-02             | 1.56                 | 1.42                             | 3.07E-04             | 0.43                 | -0.92                            | 2.31E-01             | 0.96                 | 0.4                              | 6.11E-01             | 0.3                  | -1.52                            | 8.90E-03             |
| ENSMUSG00000070427 | Il18bp   | 0.36                 | -3.67                            | 2.26E-16             | 7.98                 | 1.3                              | 1.81E-02             | 8.03                 | 1.54                             | 1.54E-05             | 1.68                 | -1.29                            | 2.41E-02             | 4.37                 | 0.28                             | 8.02E-01             | 1.63                 | -1.35                            | 8.65E-03             |
| ENSMUSG00000074874 | Ctla2b   | 0.11                 | -4.31                            | 6.50E-19             | 3.78                 | 1.25                             | 2.20E-02             | 3.77                 | 1.46                             | 6.73E-05             | 0.77                 | -1.38                            | 1.64E-02             | 1.82                 | 0                                | 1.00E+00             | 1.48                 | -0.35                            | 7.23E-01             |
| ENSMUSG00000025877 | Hk3      | 0.02                 | -5.13                            | 4.97E-18             | 1.04                 | 1.05                             | 9.13E-02             | 1.31                 | 1.75                             | 1.69E-06             | 0.41                 | -0.53                            | 5.92E-01             | 0.6                  | 0.11                             | 9.88E-01             | 0.2                  | -1.64                            | 2.77E-03             |
| ENSMUSG00000032725 | Folr2    | 0.22                 | -4.53                            | 3.26E-21             | 7.92                 | 1.08                             | 8.01E-02             | 9.66                 | 1.72                             | 1.53E-06             | 1.4                  | -1.74                            | 1.63E-03             | 5.65                 | 0.54                             | 3.80E-01             | 1.63                 | -1.52                            | 3.03E-03             |
| ENSMUSG00000030159 | Clec1b   | 0.1                  | -4.8                             | 5.29E-22             | 3.98                 | 0.96                             | 1.13E-01             | 5.12                 | 1.68                             | 2.46E-06             | 0.65                 | -1.96                            | 3.60E-04             | 3.07                 | 0.56                             | 3.09E-01             | 1.26                 | -0.96                            | 8.77E-02             |
| ENSMUSG00000017754 | Pltp     | 0.29                 | -4.68                            | 7.47E-23             | 11.35                | 1.06                             | 8.42E-02             | 13.03                | 1.54                             | 1.71E-05             | 4.28                 | -0.58                            | 4.33E-01             | 6.57                 | 0.14                             | 9.88E-01             | 3.23                 | -1.04                            | 5.64E-02             |
| ENSMUSG00000030703 | Gdpd3    | 0.04                 | -4.4                             | 4.95E-15             | 1.11                 | 0.82                             | 2.94E-01             | 1.45                 | 1.53                             | 8.49E-05             | 0.87                 | 0.43                             | 5.15E-01             | 0.56                 | -0.32                            | 9.10E-01             | 0.29                 | -1.36                            | 2.11E-02             |
| ENSMUSG00000019874 | Fabp7    | 0.26                 | -4.63                            | 5.81E-21             | 9.63                 | 1.07                             | 9.37E-02             | 10.86                | 1.51                             | 4.87E-05             | 1.51                 | -1.94                            | 6.37E-04             | 8.16                 | 0.86                             | 6.29E-02             | 2.01                 | -1.51                            | 4.38E-03             |

specific and high expressed genes in BDL-5:

| EnsemblID           | GeneName   | Cluster 1<br>Average | Cluster 1<br>Log2 Fold<br>Change | Cluster 1<br>P-Value | Cluster 2<br>Average | Cluster 2<br>Log2 Fold<br>Change | Cluster 2<br>P-Value | Cluster 3<br>Average | Cluster 3<br>Log2 Fold<br>Change | Cluster 3<br>P-Value | Cluster 4<br>Average | Cluster 4<br>Log2 Fold<br>Change | Cluster 4<br>P-Value | Cluster 5<br>Average | Cluster 5<br>Log2 Fold<br>Change | Cluster 5<br>P-Value | Cluster 6<br>Average | Cluster 6<br>Log2 Fold<br>Change | Cluster 6<br>P-Value |
|---------------------|------------|----------------------|----------------------------------|----------------------|----------------------|----------------------------------|----------------------|----------------------|----------------------------------|----------------------|----------------------|----------------------------------|----------------------|----------------------|----------------------------------|----------------------|----------------------|----------------------------------|----------------------|
| ENSMUSG00000024681  | Ms4a3      | 0.010156             | -4.24959                         | 3.58E-01             | 0.006597             | -4.12535                         | 1.00E+00             | 0                    | -6.04496                         | 5.03E-01             | 0.004613             | -4.71586                         | 9.50E-01             | 1.139875             | 7.555834                         | 6.37E-08             | 0.004348             | -4.81718                         | 7.63E-01             |
| ENSMUSG00000020125  | Elane      | 0.060934             | -5.15226                         | 5.62E-01             | 0.118754             | -4.01791                         | 1.00E+00             | 0.053568             | -5.27581                         | 1.00E+00             | 0.04152              | -5.53955                         | 1.00E+00             | 10.06754             | 7.435303                         | 7.85E-07             | 0.030435             | -5.96394                         | 1.00E+00             |
| ENSMUSG00000056399  | Prss34     | 0.016926             | -5.35093                         | 9.79E-01             | 0.046182             | -3.79837                         | 1.00E+00             | 0.022958             | -4.90717                         | 1.00E+00             | 0.009227             | -5.81181                         | 1.00E+00             | 3.639457             | 7.39065                          | 1.92E-02             | 0.017391             | -5.17301                         | 9.85E-01             |
| ENSMUSG00000040314  | Ctsg       | 0.013541             | -5.54278                         | 1.83E-01             | 0.02639              | -4.40842                         | 1.00E+00             | 0.026784             | -4.63995                         | 6.71E-01             | 0.02768              | -4.51019                         | 9.44E-01             | 3.456263             | 7.316225                         | 3.11E-08             | 0.013044             | -5.42384                         | 6.65E-01             |
| ENSMUSG00000009350  | Mpo        | 0.040623             | -4.99745                         | 2.29E-01             | 0.065974             | -4.10596                         | 1.00E+00             | 0.045915             | -4.77767                         | 6.36E-01             | 0.04152              | -4.8349                          | 9.05E-01             | 6.134968             | 7.005823                         | 6.88E-08             | 0.047827             | -4.67133                         | 7.37E-01             |
| ENSMUSG00000022157  | Mcpt8      | 0.033852             | -3.70919                         | 9.54E-01             | 0.019792             | -4.05294                         | 1.00E+00             | 0.015305             | -4.64294                         | 1.00E+00             | 0.101493             | -2.0686                          | 9.22E-01             | 2.047703             | 5.746611                         | 2.89E-02             | 0.017391             | -4.42019                         | 1.00E+00             |
| ENSMUSG00000045328  | Cenpe      | 0                    | -6.19787                         | 5.60E-11             | 0.013195             | -3.46798                         | 1.32E-02             | 0.011479             | -3.96221                         | 7.00E-06             | 0.02768              | -2.81472                         | 1.62E-03             | 1.009603             | 5.488324                         | 8.37E-35             | 0.06087              | -1.77279                         | 2.60E-02             |
| ENSMUSG00000027306  | Nusap1     | 0.020311             | -3.9507                          | 1.05E-08             | 0.02639              | -3.30889                         | 1.13E-02             | 0.019131             | -3.95687                         | 1.63E-06             | 0.004613             | -5.23195                         | 5.18E-07             | 1.506263             | 5.44211                          | 1.31E-37             | 0.100001             | -1.66854                         | 2.87E-02             |
| ENSMUSG00000020914  | Top2a      | 0.07109              | -3.64322                         | 1.01E-09             | 0.112156             | -2.80398                         | 1.46E-02             | 0.068873             | -3.63916                         | 3.70E-07             | 0.036907             | -4.40704                         | 1.61E-07             | 3.806367             | 5.291772                         | 8.61E-43             | 0.20435              | -2.03813                         | 2.77E-03             |
| ENSMUSG00000027715  | Ccna2      | 0.044008             | -3.06067                         | 1.32E-06             | 0.052779             | -2.58019                         | 4.39E-02             | 0.03061              | -3.49477                         | 7.64E-06             | 0.009227             | -4.77516                         | 1.30E-06             | 1.628392             | 5.261511                         | 2.30E-36             | 0.073914             | -2.24227                         | 2.77E-03             |
| ENSMUSG000000041431 | Ccnb1      | 0.027082             | -3.06434                         | 1.29E-05             | 0.032987             | -2.53026                         | 8.64E-02             | 0.022958             | -3.21736                         | 1.57E-04             | 0.018453             | -3.38888                         | 4.55E-04             | 1.046242             | 5.23999                          | 1.87E-30             | 0.034783             | -2.62181                         | 1.92E-03             |
| ENSMUSG00000038943  | Prc1       | 0.013541             | -4.32094                         | 4.84E-09             | 0.006597             | -4.52007                         | 2.23E-03             | 0.026784             | -3.41144                         | 2.13E-05             | 0.009227             | -4.52177                         | 6.19E-06             | 1.347495             | 5.08024                          | 1.73E-32             | 0.134784             | -1.09194                         | 2.19E-01             |
| ENSMUSG00000001403  | Ube2c      | 0.06432              | -3.90977                         | 8.58E-09             | 0.178131             | -2.27966                         | 1.05E-01             | 0.114788             | -3.0435                          | 7.26E-05             | 0.073813             | -3.60424                         | 5.63E-05             | 4.070981             | 5.056437                         | 9.23E-33             | 0.208698             | -2.13668                         | 6.77E-03             |
| ENSMUSG00000094777  | Hist1h2ap  | 0.054164             | -4.80354                         | 1.92E-11             | 0.131949             | -3.36107                         | 1.23E-02             | 0.172183             | -3.12385                         | 4.78E-05             | 0.239893             | -2.58962                         | 2.59E-03             | 6.367014             | 5.033354                         | 1.06E-32             | 0.391309             | -1.87914                         | 1.93E-02             |
| ENSMUSG00000040204  | 2810417H13 | 0.037238             | -4.50356                         | 3.21E-12             | 0.105559             | -2.85958                         | 1.35E-02             | 0.091831             | -3.20631                         | 4.35E-06             | 0.133787             | -2.612                           | 5.57E-04             | 3.643528             | 4.991723                         | 3.61E-38             | 0.221742             | -1.88761                         | 6.59E-03             |
| ENSMUSG00000020649  | Rrm2       | 0.060934             | -2.7618                          | 3.62E-05             | 0.059377             | -2.58019                         | 7.78E-02             | 0.019131             | -4.24346                         | 2.17E-06             | 0.018453             | -4.18535                         | 2.80E-05             | 1.762735             | 4.945919                         | 4.24E-29             | 0.126088             | -1.62694                         | 5.74E-02             |
| ENSMUSG00000017716  | Birc5      | 0.101557             | -3.16523                         | 2.95E-08             | 0.145143             | -2.47259                         | 2.97E-02             | 0.065047             | -3.74768                         | 1.56E-07             | 0.08304              | -3.34424                         | 1.39E-05             | 3.733089             | 4.832708                         | 1.46E-37             | 0.273916             | -1.63029                         | 1.81E-02             |
| ENSMUSG00000027469  | Tpx2       | 0.016926             | -3.84579                         | 2.05E-08             | 0.039585             | -2.48455                         | 5.00E-02             | 0.045915             | -2.47883                         | 5.91E-04             | 0.04152              | -2.54694                         | 1.87E-03             | 1.127662             | 4.703847                         | 9.02E-31             | 0.073914             | -1.76351                         | 1.72E-02             |
| ENSMUSG00000031004  | Mki67      | 0.030467             | -4.15078                         | 2.66E-11             | 0.184728             | -1.43842                         | 2.96E-01             | 0.091831             | -2.57605                         | 7.47E-05             | 0.064587             | -3.01104                         | 6.14E-05             | 2.28382              | 4.568773                         | 1.08E-34             | 0.152176             | -1.80254                         | 7.04E-03             |
| ENSMUSG00000026605  | Cenpf      | 0.037238             | -2.90289                         | 1.73E-05             | 0.046182             | -2.37062                         | 1.02E-01             | 0.038263             | -2.81294                         | 4.89E-04             | 0.023067             | -3.38466                         | 3.65E-04             | 1.172442             | 4.545707                         | 2.63E-25             | 0.104349             | -1.34437                         | 1.24E-01             |
| ENSMUSG00000023505  | Cdca3      | 0.050779             | -2.76162                         | 1.75E-06             | 0.046182             | -2.65548                         | 2.43E-02             | 0.034437             | -3.24112                         | 6.86E-06             | 0.050747             | -2.64698                         | 5.63E-04             | 1.420772             | 4.530226                         | 3.50E-32             | 0.12174              | -1.41404                         | 4.58E-02             |
| ENSMUSG00000023015  | Racgap1    | 0.016926             | -3.8812                          | 9.24E-09             | 0.052779             | -2.1487                          | 8.68E-02             | 0.03061              | -3.06328                         | 3.49E-05             | 0.0692               | -1.87792                         | 1.81E-02             | 1.111378             | 4.372598                         | 2.74E-28             | 0.108697             | -1.233                           | 1.09E-01             |
| ENSMUSG00000057729  | Prtn3      | 0.196344             | -3.34196                         | 4.31E-02             | 0.138546             | -3.65453                         | 7.92E-01             | 0.145399             | -3.73229                         | 1.08E-01             | 0.94112              | -0.90372                         | 1.00E+00             | 7.559811             | 4.326746                         | 5.30E-07             | 0.486962             | -1.92658                         | 5.73E-01             |
| ENSMUSG00000001228  | Uhrf1      | 0.044008             | -2.64121                         | 1.48E-05             | 0.079169             | -1.61819                         | 2.63E-01             | 0.015305             | -3.94615                         | 1.67E-06             | 0.032293             | -2.93103                         | 4.26E-04             | 1.115449             | 4.309682                         | 7.16E-27             | 0.12174              | -1.0801                          | 1.90E-01             |
| ENSMUSG00000028873  | Cdca8      | 0.033852             | -3.09573                         | 1.77E-07             | 0.046182             | -2.43309                         | 3.41E-02             | 0.034437             | -3.01756                         | 1.71E-05             | 0.0692               | -1.99062                         | 7.76E-03             | 1.184655             | 4.289304                         | 7.26E-30             | 0.12174              | -1.17871                         | 1.09E-01             |
| ENSMUSG00000019942  | Cdk1       | 0.067705             | -2.86739                         | 3.54E-07             | 0.112156             | -1.96297                         | 9.36E-02             | 0.080352             | -2.57797                         | 8.95E-05             | 0.046133             | -3.28143                         | 2.22E-05             | 1.901148             | 4.133343                         | 1.13E-28             | 0.243481             | -0.89051                         | 2.73E-01             |
| ENSMUSG00000032254  | Kif23      | 0.010156             | -4.60763                         | 8.50E-11             | 0.138546             | -0.94068                         | 7.09E-01             | 0.072699             | -2.00107                         | 3.33E-03             | 0.036907             | -2.87391                         | 3.21E-04             | 1.176513             | 4.123269                         | 1.13E-26             | 0.113045             | -1.31605                         | 7.52E-02             |
| ENSMUSG00000024590  | Lmnb1      | 0.06432              | -2.59809                         | 1.92E-06             | 0.079169             | -2.10739                         | 5.97E-02             | 0.076526             | -2.30472                         | 3.16E-04             | 0.147627             | -1.28967                         | 9.54E-02             | 1.428914             | 3.781303                         | 3.07E-25             | 0.156523             | -1.21273                         | 8.08E-02             |
| ENSMUSG00000032218  | Ccnb2      | 0.06432              | -2.29755                         | 8.33E-05             | 0.046182             | -2.53153                         | 3.84E-02             | 0.118615             | -1.35173                         | 7.21E-02             | 0.073813             | -1.99991                         | 1.19E-02             | 1.164301             | 3.749813                         | 1.80E-21             | 0.113045             | -1.39428                         | 6.33E-02             |
| ENSMUSG00000054717  | Hmgb2      | 0.192959             | -4.00963                         | 4.09E-13             | 0.930237             | -1.54832                         | 2.01E-01             | 0.658121             | -2.16482                         | 3.16E-04             | 1.591599             | -0.76477                         | 4.49E-01             | 10.49092             | 3.643427                         | 2.93E-14             | 1.091316             | -1.36522                         | 3.76E-02             |

**Top 30 highly expressed genes in BDL-4:**

| EnsemblID          | GeneName | Cluster 1<br>Average | Cluster 1<br>Log2 Fold<br>Change | Cluster 1<br>P-Value | Cluster 2<br>Average | Cluster 2<br>Log2 Fold<br>Change | Cluster 2<br>P-Value | Cluster 3<br>Average | Cluster 3<br>Log2 Fold<br>Change | Cluster 3<br>P-Value | Cluster 4<br>Average | Cluster 4<br>Log2 Fold<br>Change | Cluster 4<br>P-Value | Cluster 5<br>Average | Cluster 5<br>Log2 Fold<br>Change | Cluster 5<br>P-Value | Cluster 6<br>Average | Cluster 6<br>Log2 Fold<br>Change | Cluster 6<br>P-Value |
|--------------------|----------|----------------------|----------------------------------|----------------------|----------------------|----------------------------------|----------------------|----------------------|----------------------------------|----------------------|----------------------|----------------------------------|----------------------|----------------------|----------------------------------|----------------------|----------------------|----------------------------------|----------------------|
| ENSMUSG00000029379 | Cxcl3    | 0.023697             | -4.9702                          | 1.00E+00             | 0.02639              | -4.51853                         | 1.00E+00             | 0.053568             | -3.8327                          | 1.00E+00             | 4.179678             | 7.059515                         | 1.51E-03             | 0.008142             | -6.06433                         | 1.00E+00             | 0.039131             | -4.20266                         | 1.00E+00             |
| ENSMUSG00000009185 | Ccl8     | 0.003385             | -6.07998                         | 6.07E-02             | 0.032987             | -3.34918                         | 1.00E+00             | 0.198967             | -0.97869                         | 1.00E+00             | 1.882239             | 4.505257                         | 3.10E-04             | 0.113987             | -1.81412                         | 1.00E+00             | 0.047827             | -3.02363                         | 8.00E-01             |

|                     |         |          |          |          |          |          |          |          |          |          |          |          |          |          |          |          |          |          |          |
|---------------------|---------|----------|----------|----------|----------|----------|----------|----------|----------|----------|----------|----------|----------|----------|----------|----------|----------|----------|----------|
| ENSMUSG00000035042  | Ccl5    | 0.047393 | -5.55105 | 1.85E-03 | 0.145143 | -3.79562 | 8.26E-01 | 1.105796 | -0.89859 | 1.00E+00 | 8.193276 | 3.486021 | 2.46E-04 | 1.893006 | 0.006812 | 9.77E-01 | 0.313047 | -2.79335 | 3.47E-01 |
| ENSMUSG00000058427  | Cxcl2   | 0.084631 | -3.58551 | 8.64E-01 | 0.197923 | -2.19119 | 1.00E+00 | 0.505069 | -0.8719  | 9.74E-01 | 3.584558 | 3.357638 | 3.88E-02 | 0.411169 | -1.1876  | 1.00E+00 | 0.539136 | -0.74952 | 8.45E-01 |
| ENSMUSG00000022584  | Ly6c2   | 0.084631 | -3.36807 | 1.37E-04 | 0.085767 | -3.14397 | 1.46E-01 | 0.210446 | -1.99751 | 8.61E-02 | 3.012505 | 3.250262 | 9.05E-08 | 1.062526 | 0.680985 | 5.30E-01 | 0.08261  | -3.31266 | 3.27E-03 |
| ENSMUSG000000024672 | Ms4a7   | 0.027082 | -4.63382 | 4.04E-11 | 0.244105 | -1.3704  | 4.59E-01 | 0.497417 | -0.32237 | 9.78E-01 | 2.412772 | 3.16002  | 1.53E-12 | 0.398956 | -0.68104 | 6.54E-01 | 0.195654 | -1.77218 | 2.02E-02 |
| ENSMUSG000000040751 | Lat2    | 0.013541 | -4.7292  | 1.08E-12 | 0.092364 | -1.98043 | 7.67E-02 | 0.156878 | -1.32694 | 4.61E-02 | 1.416293 | 3.125834 | 7.02E-15 | 0.33382  | -0.1001  | 1.00E+00 | 0.217394 | -0.79546 | 3.25E-01 |
| ENSMUSG000000022204 | Napsa   | 0.003385 | -5.85473 | 6.04E-12 | 0.072572 | -2.10162 | 1.27E-01 | 0.156878 | -1.10245 | 2.31E-01 | 1.213306 | 3.079013 | 1.68E-11 | 0.394885 | 0.451155 | 6.66E-01 | 0.08261  | -2.02887 | 8.59E-03 |
| ENSMUSG000000049103 | Ccr2    | 0.067705 | -4.3167  | 2.19E-13 | 0.349664 | -1.78897 | 1.19E-01 | 0.89535  | -0.40015 | 8.47E-01 | 4.419571 | 3.063995 | 2.30E-14 | 1.005532 | -0.19967 | 1.00E+00 | 0.300003 | -2.09122 | 1.02E-03 |
| ENSMUSG00000030144  | Clec4d  | 0.030467 | -3.45387 | 1.22E-04 | 0.079169 | -1.93038 | 5.28E-01 | 0.149225 | -1.12418 | 4.97E-01 | 1.125653 | 2.937704 | 1.65E-06 | 0.236117 | -0.38045 | 1.00E+00 | 0.239133 | -0.35378 | 1.00E+00 |
| ENSMUSG00000036594  | H2-Aa   | 0.802303 | -5.10867 | 4.07E-21 | 11.59828 | -1.01516 | 4.09E-01 | 20.61219 | -0.12279 | 1.00E+00 | 83.28446 | 2.936245 | 4.87E-13 | 16.62181 | -0.48569 | 6.66E-01 | 5.95224  | -2.08671 | 1.28E-04 |
| ENSMUSG00000060586  | H2-Eb1  | 0.646582 | -4.4857  | 1.03E-16 | 6.84813  | -0.83714 | 6.08E-01 | 10.57585 | -0.16585 | 1.00E+00 | 43.54984 | 2.915931 | 4.87E-13 | 7.852922 | -0.66239 | 4.67E-01 | 3.843521 | -1.77495 | 3.14E-03 |
| ENSMUSG00000029816  | Gpnmb   | 0.091402 | -4.53447 | 3.92E-08 | 0.71912  | -1.37641 | 7.30E-01 | 2.020277 | 0.259425 | 8.72E-01 | 6.55093  | 2.909674 | 4.13E-07 | 0.858977 | -1.17131 | 4.27E-01 | 0.665225 | -1.55543 | 1.52E-01 |
| ENSMUSG00000021451  | Sema4d  | 0.044008 | -2.8924  | 2.64E-07 | 0.145143 | -1.00797 | 5.76E-01 | 0.206619 | -0.53749 | 6.55E-01 | 1.065679 | 2.8926   | 4.87E-13 | 0.211691 | -0.4904  | 7.54E-01 | 0.12174  | -1.34236 | 4.77E-02 |
| ENSMUSG00000069515  | Lyz1    | 0        | -7.04821 | 1.02E-09 | 0.052779 | -2.72037 | 1.86E-01 | 0.19514  | -0.97078 | 5.63E-01 | 1.310186 | 2.884583 | 1.05E-06 | 0.227975 | -0.71313 | 8.17E-01 | 0.4087   | 0.268689 | 7.66E-01 |
| ENSMUSG00000024610  | Cd74    | 5.216662 | -3.59232 | 5.62E-14 | 28.00608 | -0.93934 | 4.68E-01 | 46.0761  | -0.1706  | 1.00E+00 | 186.5124 | 2.849114 | 4.87E-13 | 38.99593 | -0.45096 | 7.04E-01 | 13.58276 | -2.09746 | 9.11E-05 |
| ENSMUSG00000073421  | H2-Ab1  | 1.357483 | -3.95998 | 2.81E-15 | 11.84238 | -0.5773  | 8.52E-01 | 15.92116 | -0.1149  | 1.00E+00 | 59.86258 | 2.712145 | 4.87E-13 | 13.32839 | -0.41575 | 7.46E-01 | 4.973968 | -1.96072 | 2.64E-04 |
| ENSMUSG000000021728 | Emb     | 0.023697 | -3.95782 | 9.97E-10 | 0.131949 | -1.39015 | 3.60E-01 | 0.187488 | -0.9573  | 2.71E-01 | 1.176399 | 2.689123 | 5.45E-10 | 0.476305 | 0.6438   | 3.68E-01 | 0.095653 | -1.94432 | 5.65E-03 |
| ENSMUSG00000025804  | Ccr1    | 0.037238 | -3.75805 | 1.07E-09 | 0.197923 | -1.2085  | 4.83E-01 | 0.248708 | -0.94419 | 2.70E-01 | 1.517786 | 2.640407 | 6.88E-10 | 0.49666  | 0.219992 | 9.02E-01 | 0.256525 | -0.87454 | 2.96E-01 |
| ENSMUSG00000069516  | Lyz2    | 1.926204 | -4.80084 | 5.25E-21 | 18.53877 | -1.30886 | 1.68E-01 | 35.26302 | -0.33842 | 8.09E-01 | 144.7571 | 2.583151 | 2.73E-12 | 39.19133 | -0.15491 | 1.00E+00 | 27.26552 | -0.75257 | 2.34E-01 |
| ENSMUSG00000099974  | Bcl2a1d | 0.010156 | -5.63706 | 1.01E-11 | 0.283689 | -0.96343 | 8.51E-01 | 0.554811 | 0.078546 | 1.00E+00 | 1.799199 | 2.579301 | 2.71E-07 | 0.464092 | -0.22953 | 1.00E+00 | 0.217394 | -1.42783 | 1.09E-01 |
| ENSMUSG00000074677  | Sirpb1c | 0.016926 | -4.86139 | 3.04E-14 | 0.303482 | -0.66356 | 8.84E-01 | 0.478285 | 0.044655 | 1.00E+00 | 1.536239 | 2.492324 | 5.64E-10 | 0.443737 | -0.08528 | 1.00E+00 | 0.160871 | -1.68318 | 7.04E-03 |
| ENSMUSG00000027533  | Fabp5   | 0.473934 | -2.34399 | 7.79E-04 | 0.395846 | -2.46101 | 1.40E-01 | 1.040749 | -1.09791 | 3.58E-01 | 6.504797 | 2.453242 | 9.89E-06 | 0.761273 | -1.57475 | 1.26E-01 | 3.226123 | 0.864493 | 1.84E-01 |
| ENSMUSG00000015437  | Gzmb    | 0.013541 | -4.80305 | 1.59E-02 | 0.019792 | -3.99339 | 9.22E-01 | 0.007653 | -5.32576 | 5.29E-02 | 1.199466 | 2.422067 | 2.77E-02 | 1.029958 | 2.129984 | 5.78E-02 | 0.008696 | -5.10302 | 8.86E-02 |
| ENSMUSG00000037548  | H2-DMb2 | 0.037238 | -4.26809 | 2.08E-13 | 0.422235 | -0.60489 | 9.37E-01 | 0.654294 | 0.088827 | 1.00E+00 | 1.983732 | 2.401138 | 1.55E-09 | 0.659499 | 0.101757 | 1.00E+00 | 0.152176 | -2.19991 | 2.74E-04 |
| ENSMUSG00000056290  | Ms4a4b  | 0.016926 | -4.65698 | 8.87E-10 | 0.263897 | -0.65778 | 1.00E+00 | 0.348192 | -0.26038 | 1.00E+00 | 1.277893 | 2.368194 | 2.03E-06 | 0.517015 | 0.437599 | 6.84E-01 | 0.126088 | -1.8299  | 2.54E-02 |
| ENSMUSG00000026879  | Gsn     | 0.013541 | -4.75805 | 7.72E-13 | 0.250702 | -0.55966 | 9.77E-01 | 0.309929 | -0.26397 | 9.78E-01 | 1.134879 | 2.353458 | 1.55E-08 | 0.33382  | -0.13429 | 1.00E+00 | 0.247829 | -0.61951 | 4.85E-01 |
| ENSMUSG00000029373  | Pf4     | 0.037238 | -5.00272 | 2.46E-02 | 0.389248 | -1.49738 | 1.00E+00 | 0.711689 | -0.63352 | 1.00E+00 | 3.215492 | 2.340346 | 4.62E-02 | 0.858977 | -0.31478 | 1.00E+00 | 1.226101 | 0.301233 | 6.89E-01 |
| ENSMUSG00000023992  | Trem2   | 0.047393 | -5.05248 | 4.46E-18 | 0.606963 | -1.22398 | 3.43E-01 | 1.453987 | 0.150558 | 9.54E-01 | 4.133545 | 2.322237 | 3.50E-09 | 1.302714 | -0.04472 | 1.00E+00 | 0.734791 | -0.98178 | 1.43E-01 |
| ENSMUSG00000000682  | Cd52    | 0.284361 | -4.69695 | 3.96E-21 | 3.879287 | -0.67868 | 7.98E-01 | 7.044187 | 0.307004 | 7.55E-01 | 18.03812 | 2.273061 | 6.79E-10 | 6.383298 | 0.124789 | 1.00E+00 | 1.395668 | -2.29073 | 1.16E-05 |
