# Supplementary material for: Single-Cell Transcriptomes Reveal Characteristic Features of Mouse Hepatocytes with Liver Cholestatic Injury
Source: MDPI journal article supplement (doi:10.3390/cells8091069), 2019-09-11
Supplement: s1 [file s1]

Single-cell transcriptomes reveal characteristic features of Mouse Hepatocytes with Cholestasis Injury

Na Chang, Lei Tian, Xiaofang Ji, Xuan Zhou, Lei Hou, Xinhao Zhao, Yuanru Yang, Lin Yang, Liying Li

Supplemental Table 1: metrics summary (Related to Supplementary Figure 1)

| Sample | Estimated<br>Number<br>of Cells | Mean<br>Reads per<br>Cell | Median<br>Genes per<br>Cell | Number of Reads | Valid<br>Barcodes | Reads<br>Mapped<br>Confidently to<br>Transcriptome | Reads<br>Mapped<br>Confidently to<br>Exonic Regions | Reads<br>Mapped<br>Confidently to<br>Intronic<br>Regions | Reads<br>Mapped<br>Confidently to<br>Intergenic<br>Regions | Reads<br>Mapped<br>Antisense to<br>Gene | Sequencing<br>Saturation | Q30 Bases<br>in<br>Barcode | Q30 Bases in<br>RNA Read | Q30 Bases<br>in UMI | Fraction<br>Reads in<br>Cells | Total<br>Genes<br>Detected | Median<br>UMI<br>Counts<br>per Cell |
|--------|---------------------------------|---------------------------|-----------------------------|-----------------|-------------------|----------------------------------------------------|-----------------------------------------------------|----------------------------------------------------------|------------------------------------------------------------|-----------------------------------------|--------------------------|----------------------------|--------------------------|---------------------|-------------------------------|----------------------------|-------------------------------------|
| Sham   | 1,173                           | 361,220                   | 968                         | 423,712,047     | 97.80%            | 64.00%                                             | 66.40%                                              | 2.00%                                                    | 1.30%                                                      | 1.60%                                   | 51.40%                   | 97.10%                     | 89.60%                   | 97.00%              | 3.70%                         | 13,117                     | 3,680                               |
| BDL    | 1,186                           | 340,465                   | 3,303                       | 403,792,392     | 97.40%            | 71.00%                                             | 73.70%                                              | 7.10%                                                    | 2.80%                                                      | 2.70%                                   | 85.00%                   | 96.90%                     | 82.30%                   | 96.80%              | 44.40%                        | 17,538                     | 12,542                              |
