# Supplementary material for: Single-Cell Transcriptomes Reveal Characteristic Features of Mouse Hepatocytes with Liver Cholestatic Injury
Source: MDPI journal article supplement (doi:10.3390/cells8091069), 2019-09-11
Supplement: s1 [file s1]

Single-cell transcriptomes reveal characteristic features of Mouse Hepatocytes with Cholestasis Injury

Na Chang, Lei Tian, Xiaofang Ji, Xuan Zhou, Lei Hou, Xinhao Zhao, Yuanru Yang, Lin Yang, Liying Li

Supplemental Table 3: High expressed genes of BDL-6 (Related to Figure 4)

Top 200 hige expressed genes of BDL-6

| Gene Group | EnsemblID           | GeneName | Cluster 1 Average | Cluster 1 Log2 Fold Change | Cluster 1 P-Value | Cluster 2 Average | Cluster 2 Log2 Fold Change | Cluster 2 P-Value | Cluster 3 Average | Cluster 3 Log2 Fold Change | Cluster 3 P-Value | Cluster 4 Average | Cluster 4 Log2 Fold Change | Cluster 4 P-Value | Cluster 5 Average | Cluster 5 Log2 Fold Change | Cluster 5 P-Value | Cluster 6 Average | Cluster 6 Log2 Fold Change | Cluster 6 P-Value |
|------------|---------------------|----------|-------------------|----------------------------|-------------------|-------------------|----------------------------|-------------------|-------------------|----------------------------|-------------------|-------------------|----------------------------|-------------------|-------------------|----------------------------|-------------------|-------------------|----------------------------|-------------------|
| Group 1    | ENSMUSG00000039167  | Adgrl4   | 0.057549          | -4.7628                    | 1.45E-12          | 0.079169          | -4.10188                   | 1.30E-03          | 0.026784          | -5.72084                   | 1.10E-10          | 0.05536           | -4.69239                   | 1.33E-07          | 0.056994          | -4.69961                   | 2.13E-09          | 7.730521          | 7.16226                    | 4.63E-64          |
|            | ENSMUSG00000051855  | Mest     | 0.010156          | -4.68855                   | 8.71E-08          | 0.013195          | -3.97297                   | 1.96E-02          | 0.007653          | -4.88755                   | 4.84E-06          | 0.01384           | -4.1447                    | 2.27E-04          | 0.012213          | -4.35995                   | 2.32E-05          | 1.626105          | 7.086081                   | 3.88E-40          |
|            | ENSMUSG00000058396  | Gpr182   | 0.023697          | -5.15241                   | 1.58E-12          | 0.046182          | -4.01805                   | 2.44E-03          | 0.03061           | -4.76134                   | 2.14E-08          | 0.032293          | -4.60856                   | 6.48E-07          | 0.044781          | -4.2334                    | 1.28E-07          | 4.469615          | 6.992164                   | 1.03E-57          |
|            | ENSMUSG00000032125  | Robo4    | 0.010156          | -4.74008                   | 2.05E-10          | 0.013195          | -4.02437                   | 3.26E-03          | 0.007653          | -4.93895                   | 7.78E-08          | 0.009227          | -4.61488                   | 2.17E-06          | 0.028497          | -3.39695                   | 1.37E-05          | 1.673932          | 6.847683                   | 3.74E-52          |
|            | ENSMUSG00000056492  | Adgrf5   | 0.027082          | -5.11107                   | 1.29E-13          | 0.052779          | -3.97671                   | 1.33E-03          | 0.03061           | -4.89128                   | 2.66E-09          | 0.032293          | -4.73838                   | 8.64E-08          | 0.073278          | -3.69198                   | 4.44E-07          | 4.865271          | 6.828116                   | 2.31E-61          |
|            | ENSMUSG00000062960  | Kdr      | 0.06432           | -5.34015                   | 3.31E-15          | 0.059377          | -5.21056                   | 7.57E-05          | 0.080352          | -4.98191                   | 6.15E-10          | 0.087653          | -4.7963                    | 2.55E-08          | 0.146555          | -4.11589                   | 2.11E-08          | 12.77405          | 7.149553                   | 7.82E-68          |
|            | ENSMUSG00000041378  | Cldn5    | 0.037238          | -5.02564                   | 2.97E-13          | 0.032987          | -4.8972                    | 2.35E-04          | 0.045915          | -4.68939                   | 6.85E-09          | 0.050747          | -4.48179                   | 3.24E-07          | 0.069207          | -4.10613                   | 6.49E-08          | 6.143546          | 6.975366                   | 6.24E-62          |
|            | ENSMUSG00000054690  | Emcn     | 0.010156          | -4.92321                   | 1.56E-10          | 0.006597          | -4.7952                    | 1.34E-03          | 0.011479          | -4.70342                   | 2.02E-07          | 0.009227          | -4.79758                   | 2.07E-06          | 0.020355          | -4.00326                   | 1.87E-06          | 1.917413          | 7.223701                   | 3.50E-53          |
|            | ENSMUSG00000044562  | Rasip1   | 0.023697          | -4.48786                   | 5.38E-11          | 0.013195          | -4.77926                   | 6.03E-04          | 0.026784          | -4.26807                   | 1.34E-07          | 0.018453          | -4.62852                   | 4.97E-07          | 0.036639          | -3.83301                   | 6.05E-07          | 2.813075          | 6.775649                   | 2.09E-56          |
|            | ENSMUSG00000003411  | Rab3b    | 0.013541          | -4.34015                   | 1.91E-07          | 0.006597          | -4.53913                   | 9.17E-03          | 0.015305          | -4.12037                   | 2.35E-05          | 0.01384           | -4.12204                   | 1.83E-04          | 0.032568          | -3.14821                   | 8.12E-04          | 1.569583          | 6.450218                   | 3.41E-37          |
|            | ENSMUSG00000022579  | Gpihbp1  | 0.060934          | -4.81625                   | 6.83E-13          | 0.052779          | -4.7671                    | 2.81E-04          | 0.084178          | -4.31794                   | 3.16E-08          | 0.046133          | -5.06666                   | 2.08E-08          | 0.077349          | -4.41293                   | 8.21E-09          | 8.42618           | 6.978384                   | 9.47E-63          |
|            | ENSMUSG00000037010  | Apln     | 0.010156          | -4.45299                   | 2.08E-04          | 0.006597          | -4.32742                   | 1.51E-01          | 0.011479          | -4.2332                    | 3.70E-03          | 0.009227          | -4.32858                   | 1.18E-02          | 0.012213          | -4.12438                   | 7.10E-03          | 1.378276          | 6.955132                   | 3.43E-23          |
|            | ENSMUSG00000074491  | Clec4g   | 0.074475          | -4.75183                   | 5.69E-12          | 0.072572          | -4.56291                   | 7.90E-04          | 0.107136          | -4.19388                   | 1.56E-07          | 0.101493          | -4.20798                   | 2.03E-06          | 0.101775          | -4.24448                   | 7.94E-08          | 9.678368          | 6.695391                   | 3.83E-56          |
|            | ENSMUSG00000001946  | Esam     | 0.020311          | -5.04737                   | 5.08E-13          | 0.039585          | -3.91301                   | 1.75E-03          | 0.038263          | -4.16882                   | 8.02E-08          | 0.023067          | -4.72758                   | 1.48E-07          | 0.056994          | -3.60581                   | 9.75E-07          | 3.60004           | 6.6456                     | 7.20E-58          |
|            | ENSMUSG00000052921  | Arhgef15 | 0.013541          | -4.34015                   | 6.29E-10          | 0.013195          | -3.95037                   | 2.84E-03          | 0.022958          | -3.62729                   | 3.23E-06          | 0.009227          | -4.54088                   | 1.78E-06          | 0.020355          | -3.7447                    | 2.25E-06          | 1.573931          | 6.524587                   | 4.30E-51          |
|            | ENSMUSG000000034684 | Sema3f   | 0.020311          | -4.35318                   | 3.78E-10          | 0.02639           | -3.70964                   | 4.65E-03          | 0.038263          | -3.47047                   | 6.34E-06          | 0.023067          | -4.03442                   | 6.75E-06          | 0.036639          | -3.50188                   | 5.58E-06          | 2.195677          | 6.1964                     | 2.01E-48          |
|            | ENSMUSG00000001240  | Ramp2    | 0.023697          | -5.35487                   | 2.49E-14          | 0.052779          | -4.0494                    | 1.14E-03          | 0.065047          | -3.95331                   | 1.55E-07          | 0.0692            | -3.80154                   | 3.85E-06          | 0.04071           | -4.56329                   | 3.07E-09          | 5.091361          | 6.679465                   | 7.76E-60          |
|            | ENSMUSG00000009654  | Oit3     | 0.016926          | -4.30278                   | 2.24E-09          | 0.019792          | -3.7599                    | 6.57E-03          | 0.026784          | -3.66142                   | 6.57E-06          | 0.02768           | -3.53327                   | 8.29E-05          | 0.020355          | -3.97418                   | 1.81E-06          | 1.826107          | 6.305478                   | 2.38E-46          |
|            | ENSMUSG00000027358  | Bmp2     | 0.027082          | -4.25634                   | 8.73E-09          | 0.046182          | -3.29416                   | 2.12E-02          | 0.034437          | -3.88231                   | 6.57E-06          | 0.046133          | -3.41849                   | 2.64E-04          | 0.028497          | -4.09991                   | 3.09E-06          | 2.643508          | 6.20067                    | 2.10E-42          |
|            | ENSMUSG00000044258  | Ctla2a   | 0.088016          | -4.81154                   | 4.11E-13          | 0.131949          | -4.0428                    | 1.30E-03          | 0.160704          | -3.9122                    | 2.04E-07          | 0.239893          | -3.28134                   | 5.15E-05          | 0.227975          | -3.38956                   | 3.28E-06          | 11.561            | 6.097848                   | 3.59E-52          |
|            | ENSMUSG00000025964  | Adam23   | 0.033852          | -4.3598                    | 4.88E-10          | 0.039585          | -3.88434                   | 4.20E-03          | 0.053568          | -3.68569                   | 3.63E-06          | 0.087653          | -2.93797                   | 5.85E-04          | 0.056994          | -3.57687                   | 6.50E-06          | 3.430473          | 5.968398                   | 1.25E-44          |
|            | ENSMUSG00000025608  | Podxl    | 0.027082          | -4.25634                   | 3.25E-09          | 0.02639           | -3.97894                   | 4.94E-03          | 0.022958          | -4.40362                   | 5.33E-07          | 0.004613          | -5.89806                   | 1.30E-07          | 0.028497          | -4.09991                   | 1.36E-06          | 2.708726          | 6.873204                   | 1.07E-50          |
|            | ENSMUSG00000041445  | Mmrn2    | 0.033852          | -5.42095                   | 3.83E-13          | 0.052779          | -4.57773                   | 1.11E-03          | 0.049742          | -4.85078                   | 1.92E-08          | 0.018453          | -6.01951                   | 6.26E-09          | 0.048852          | -4.8497                    | 8.54E-09          | 7.482692          | 7.507596                   | 3.98E-62          |
|            | ENSMUSG00000046916  | Myct1    | 0.027082          | -4.34354                   | 4.50E-10          | 0.039585          | -3.57598                   | 6.90E-03          | 0.042089          | -3.70236                   | 2.80E-06          | 0.009227          | -5.39729                   | 1.27E-07          | 0.028497          | -4.18698                   | 2.94E-07          | 2.847858          | 6.570958                   | 1.37E-51          |
|            | ENSMUSG00000033191  | Tie1     | 0.020311          | -4.10947                   | 8.36E-10          | 0.02639           | -3.46692                   | 5.46E-03          | 0.03061           | -3.5207                    | 3.19E-06          | 0.009227          | -4.80075                   | 4.45E-07          | 0.032568          | -3.41188                   | 5.32E-06          | 1.86089           | 6.229542                   | 1.44E-50          |
|            | ENSMUSG00000000093  | Tbx2     | 0.016926          | -4.02663                   | 2.66E-08          | 0.019792          | -3.48512                   | 1.14E-02          | 0.011479          | -4.39969                   | 1.05E-06          | 0.004613          | -5.08347                   | 1.91E-06          | 0.024426          | -3.47168                   | 2.75E-05          | 1.526104          | 6.554193                   | 2.77E-46          |
|            | ENSMUSG000000004655 | Aqp1     | 0.233582          | -4.29164                   | 3.49E-12          | 0.250702          | -4.00987                   | 9.11E-04          | 0.19514           | -4.50577                   | 2.66E-09          | 0.1384            | -4.93383                   | 5.78E-09          | 0.341962          | -3.67869                   | 2.00E-07          | 21.36111          | 6.512614                   | 1.08E-61          |
|            | ENSMUSG00000038007  | Acer2    | 0.033852          | -3.97803                   | 2.06E-08          | 0.032987          | -3.72925                   | 8.59E-03          | 0.015305          | -4.90907                   | 1.20E-07          | 0.018453          | -4.585                     | 4.16E-06          | 0.032568          | -3.94339                   | 3.46E-06          | 2.717421          | 6.632708                   | 5.83E-48          |
|            | ENSMUSG00000026921  | Egfl7    | 0.216656          | -3.69677                   | 2.56E-10          | 0.178131          | -3.7943                    | 1.11E-03          | 0.126267          | -4.42604                   | 2.66E-09          | 0.092267          | -4.80301                   | 6.48E-09          | 0.175052          | -3.94071                   | 1.65E-08          | 13.13928          | 6.349866                   | 3.32E-61          |
|            | ENSMUSG00000028763  | Hspg2    | 0.108328          | -3.02267                   | 7.55E-08          | 0.059377          | -3.64355                   | 1.68E-03          | 0.107136          | -2.99506                   | 7.74E-06          | 0.046133          | -4.09515                   | 4.13E-07          | 0.101775          | -3.04808                   | 6.50E-06          | 4.034827          | 5.487978                   | 4.70E-48          |
|            | ENSMUSG00000046470  | Sox18    | 0.00677           | -5.00272                   | 1.17E-09          | 0.019792          | -3.4493                    | 1.66E-02          | 0.011479          | -4.36387                   | 2.17E-06          | 0.004613          | -5.04784                   | 4.34E-06          | 0.016284          | -3.92909                   | 9.23E-06          | 1.508712          | 6.978278                   | 7.14E-47          |
|            | ENSMUSG00000042807  | Hecw2    | 0.00677           | -5.29295                   | 5.99E-12          | 0.039585          | -2.923                     | 1.92E-02          | 0.015305          | -4.32962                   | 2.30E-07          | 0.009227          | -4.7491                    | 8.82E-07          | 0.024426          | -3.72875                   | 2.05E-06          | 1.826107          | 6.668048                   | 7.60E-53          |
|            | ENSMUSG00000034911  | Ushbp1   | 0.003385          | -5.0187                    | 3.33E-09          | 0.013195          | -3.29341                   | 2.00E-02          | 0.003826          | -4.79892                   | 1.31E-06          | 0.004613          | -4.47485                   | 2.38E-05          | 0.012213          | -3.67813                   | 2.77E-05          | 1.017403          | 7.049281                   | 7.36E-46          |
|            | ENSMUSG00000027955  | Fam198b  | 0.00677           | -4.53724                   | 1.92E-08          | 0.02639           | -2.65478                   | 6.74E-02          | 0.011479          | -3.89687                   | 1.57E-05          | 0.01384           | -3.5728                    | 2.53E-04          | 0.024426          | -2.96388                   | 4.71E-04          | 1.056533          | 6.025499                   | 2.19E-38          |
|            | ENSMUSG00000020154  | Ptprb    | 0.07109           | -3.64041                   | 3.09E-09          | 0.131949          | -2.57457                   | 3.20E-02          | 0.068873          | -3.63635                   | 8.04E-07          | 0.0692            | -3.56442                   | 1.17E-05          | 0.093633          | -3.18345                   | 8.22E-06          | 4.117437          | 5.616723                   | 2.76E-46          |
|            | ENSMUSG00000036185  | Sapcd1   | 0.013541          | -3.97758                   | 1.35E-03          | 0.02639           | -2.84322                   | 5.38E-01          | 0.003826          | -5.09438                   | 1.72E-03          | 0.009227          | -4.18048                   | 2.35E-02          | 0.016284          | -3.64898                   | 2.71E-02          | 1.226101          | 6.487347                   | 1.72E-19          |

|                     |          |          |          |          |          |          |          |          |          |          |          |          |          |          |          |          |          |          |          |
|---------------------|----------|----------|----------|----------|----------|----------|----------|----------|----------|----------|----------|----------|----------|----------|----------|----------|----------|----------|----------|
| ENSMUSG00000032135  | Mcam     | 0.016926 | -3.51488 | 5.31E-06 | 0.02639  | -2.64918 | 9.49E-02 | 0.007653 | -4.3119  | 1.54E-05 | 0.004613 | -4.57836 | 6.42E-05 | 0.016284 | -3.45493 | 2.39E-04 | 1.060881 | 6.191864 | 7.94E-36 |
| ENSMUSG00000000317  | Bcl6b    | 0.020311 | -3.88494 | 4.28E-08 | 0.039585 | -2.75058 | 3.94E-02 | 0.011479 | -4.48368 | 6.64E-07 | 0.01384  | -4.15962 | 1.81E-05 | 0.048852 | -2.64065 | 7.87E-04 | 1.569583 | 5.888339 | 4.58E-41 |
| ENSMUSG00000029648  | Flt1     | 0.010156 | -4.69975 | 3.57E-07 | 0.02639  | -3.23974 | 8.07E-02 | 0.011479 | -4.47997 | 3.78E-05 | 0.032293 | -3.14095 | 5.68E-03 | 0.036639 | -3.02674 | 3.21E-03 | 1.582626 | 6.099554 | 1.44E-30 |
| ENSMUSG00000049807  | Arhgap23 | 0.06432  | -2.88644 | 5.00E-07 | 0.092364 | -2.18012 | 6.61E-02 | 0.061221 | -2.90894 | 2.12E-05 | 0.08304  | -2.4192  | 1.30E-03 | 0.142484 | -1.6674  | 1.77E-02 | 2.034805 | 4.529633 | 2.05E-33 |
| ENSMUSG00000040283  | Btnl9    | 0.013541 | -3.78354 | 1.51E-06 | 0.013195 | -3.39733 | 3.29E-02 | 0.007653 | -4.3119  | 1.54E-05 | 0.023067 | -2.97103 | 2.78E-03 | 0.008142 | -4.20308 | 2.53E-05 | 1.065229 | 6.285204 | 2.07E-36 |
| ENSMUSG00000029762  | Akr1b8   | 0.040623 | -3.55422 | 4.52E-08 | 0.032987 | -3.55295 | 6.90E-03 | 0.034437 | -3.72052 | 2.33E-06 | 0.050747 | -3.12837 | 2.11E-04 | 0.020355 | -4.3587  | 1.51E-07 | 2.343504 | 5.99324  | 6.48E-46 |
| ENSMUSG00000053062  | Jam2     | 0.013541 | -4.59169 | 3.64E-07 | 0.006597 | -4.78885 | 1.20E-02 | 0.022958 | -3.88006 | 1.40E-04 | 0.009227 | -4.79121 | 1.20E-04 | 0.008142 | -5.00645 | 9.94E-06 | 1.904369 | 7.120766 | 8.00E-38 |
| ENSMUSG00000036256  | Igfbp7   | 0.771836 | -2.71879 | 3.16E-07 | 0.659743 | -2.79787 | 9.94E-03 | 1.02927  | -2.25084 | 3.16E-04 | 0.85808  | -2.47797 | 4.60E-04 | 0.643215 | -2.93434 | 5.04E-06 | 21.36111 | 4.725788 | 9.86E-15 |
| ENSMUSG00000022469  | Rapgef3  | 0.020311 | -3.81605 | 4.66E-08 | 0        | -5.51237 | 6.39E-04 | 0.015305 | -4.08951 | 1.83E-06 | 0.009227 | -4.51019 | 5.71E-06 | 0.020355 | -3.71375 | 7.63E-06 | 1.547843 | 6.652544 | 3.37E-48 |
| ENSMUSG00000041134  | Cyrr1    | 0.023697 | -3.95471 | 5.13E-09 | 0.006597 | -4.83892 | 8.94E-04 | 0.03061  | -3.56188 | 5.41E-06 | 0.032293 | -3.41086 | 7.43E-05 | 0.024426 | -3.82186 | 1.82E-06 | 1.913065 | 6.220433 | 7.40E-48 |
| ENSMUSG00000073599  | Ecscr    | 0.023697 | -3.79333 | 8.64E-08 | 0.006597 | -4.67973 | 2.17E-03 | 0.015305 | -4.26203 | 1.61E-06 | 0.02768  | -3.4456  | 1.92E-04 | 0.028497 | -3.46472 | 3.10E-05 | 1.71741  | 6.271606 | 8.97E-44 |
| ENSMUSG00000026399  | Cd55     | 0.06432  | -3.22293 | 1.55E-07 | 0.019792 | -4.44324 | 9.36E-04 | 0.026784 | -4.3497  | 8.02E-08 | 0.050747 | -3.43251 | 3.95E-05 | 0.073278 | -2.97039 | 4.76E-05 | 2.856553 | 5.82199  | 2.38E-46 |
| ENSMUSG00000028776  | Tinagl1  | 0.230197 | -2.69695 | 2.45E-06 | 0.065974 | -4.26094 | 6.24E-04 | 0.080352 | -4.1663  | 3.20E-08 | 0.05536  | -4.60877 | 7.64E-08 | 0.073278 | -4.2715  | 8.06E-09 | 6.991382 | 5.97227  | 3.12E-52 |
| ENSMUSG00000040605  | Bace2    | 0.040623 | -2.63302 | 2.80E-05 | 0.013195 | -3.66129 | 7.58E-03 | 0.011479 | -4.15618 | 1.54E-06 | 0.009227 | -4.2518  | 1.26E-05 | 0.024426 | -3.22598 | 5.64E-05 | 1.24784  | 5.812175 | 2.88E-41 |
| ENSMUSG00000020357  | Flt4     | 0.07109  | -2.97356 | 1.09E-06 | 0.032987 | -3.74902 | 3.62E-03 | 0.034437 | -3.91788 | 6.64E-07 | 0.046133 | -3.45411 | 4.51E-05 | 0.036639 | -3.80906 | 9.60E-07 | 2.656551 | 5.818717 | 1.57E-45 |
| ENSMUSG00000032766  | Gng11    | 0.331754 | -3.19883 | 1.06E-08 | 0.171533 | -3.96923 | 6.12E-04 | 0.206619 | -3.84563 | 3.77E-08 | 0.22144  | -3.69073 | 1.36E-06 | 0.284969 | -3.36169 | 5.56E-07 | 13.88711 | 5.76997  | 9.98E-54 |
| ENSMUSG00000020176  | Grb10    | 0.067705 | -2.1873  | 2.04E-04 | 0.02639  | -3.18658 | 1.26E-02 | 0.034437 | -3.08169 | 3.87E-05 | 0.032293 | -3.08737 | 2.44E-04 | 0.024426 | -3.49916 | 7.77E-06 | 1.434799 | 5.158788 | 5.51E-37 |
| ENSMUSG00000027210  | Meis2    | 0.084631 | -2.0859  | 3.11E-04 | 0.013195 | -4.14539 | 1.96E-03 | 0.019131 | -4.04998 | 5.38E-07 | 0.032293 | -3.30418 | 8.20E-05 | 0.044781 | -2.92098 | 7.14E-05 | 1.678279 | 5.266454 | 2.68E-39 |
| ENSMUSG00000007039  | Ddah2    | 0.128639 | -2.36133 | 1.55E-05 | 0.072572 | -2.97857 | 9.46E-03 | 0.049742 | -3.66703 | 3.34E-07 | 0.078427 | -2.9729  | 8.96E-05 | 0.134342 | -2.24028 | 8.30E-04 | 2.926119 | 4.919115 | 1.74E-39 |
| ENSMUSG00000049804  | Armxc4   | 0        | -7.28471 | 4.15E-14 | 0.072572 | -2.53786 | 6.12E-02 | 0.022958 | -4.24263 | 6.85E-07 | 0.01384  | -4.73341 | 1.78E-06 | 0.044781 | -3.34362 | 2.73E-05 | 2.391331 | 6.448598 | 7.43E-48 |
| ENSMUSG00000040732  | Erg      | 0.003385 | -5.22912 | 8.82E-11 | 0.019792 | -3.08442 | 1.70E-02 | 0.015305 | -3.67187 | 6.25E-06 | 0.009227 | -4.09515 | 1.39E-05 | 0.056994 | -1.92504 | 9.93E-03 | 1.113056 | 5.704458 | 8.87E-42 |
| ENSMUSG00000050493  | Fam167b  | 0.016926 | -5.82435 | 1.18E-15 | 0.118754 | -3.01217 | 1.11E-02 | 0.10331  | -3.35695 | 2.39E-06 | 0.02768  | -5.05697 | 1.74E-08 | 0.048852 | -4.37229 | 6.45E-09 | 5.239189 | 6.470179 | 4.17E-58 |
| ENSMUSG00000011263  | Exoc3l2  | 0.003385 | -5.55105 | 2.95E-11 | 0.02639  | -3.08234 | 1.94E-02 | 0.038263 | -2.83425 | 1.84E-04 | 0.01384  | -3.99893 | 2.38E-05 | 0.024426 | -3.39434 | 2.64E-05 | 1.417407 | 6.05198  | 1.38E-43 |
| ENSMUSG00000024065  | Ehd3     | 0.033852 | -4.84008 | 1.11E-11 | 0.184728 | -2.28492 | 9.36E-02 | 0.118615 | -3.05373 | 4.49E-05 | 0.08304  | -3.49789 | 5.23E-05 | 0.118058 | -3.04052 | 6.65E-05 | 4.647878 | 5.53572  | 9.07E-41 |
| ENSMUSG000000045377 | Tmem88   | 0.00677  | -4.9285  | 2.80E-10 | 0.032987 | -2.7814  | 3.20E-02 | 0.015305 | -3.96327 | 2.39E-06 | 0.004613 | -4.97384 | 1.72E-06 | 0.032568 | -2.98933 | 1.28E-04 | 1.400016 | 6.285762 | 6.48E-46 |
| ENSMUSG00000024168  | Tmem204  | 0.010156 | -4.58768 | 1.88E-10 | 0.052779 | -2.26316 | 7.07E-02 | 0.034437 | -3.02165 | 3.49E-05 | 0.009227 | -4.46288 | 2.03E-06 | 0.056994 | -2.30729 | 1.34E-03 | 1.413059 | 5.481964 | 1.33E-41 |
| ENSMUSG00000013076  | Amotl1   | 0.016926 | -4.43374 | 7.08E-11 | 0.032987 | -3.29938 | 6.81E-03 | 0.042089 | -3.19596 | 9.70E-06 | 0.01384  | -4.4808  | 7.36E-07 | 0.048852 | -2.96864 | 3.33E-05 | 1.965239 | 5.956603 | 4.45E-49 |
| ENSMUSG00000045930  | Clec14a  | 0.010156 | -4.16593 | 8.96E-08 | 0.019792 | -3.03157 | 3.70E-02 | 0.026784 | -2.92445 | 3.75E-04 | 0.009227 | -4.04249 | 7.99E-05 | 0.024426 | -3.01373 | 4.10E-04 | 1.082621 | 5.849042 | 9.85E-37 |
| ENSMUSG00000025666  | Tmem47   | 0.016926 | -3.67475 | 1.11E-07 | 0.032987 | -2.54039 | 5.19E-02 | 0.038263 | -2.55505 | 6.52E-04 | 0.009227 | -4.14595 | 1.74E-05 | 0.032568 | -2.74597 | 4.47E-04 | 1.130447 | 5.416399 | 2.41E-37 |
| ENSMUSG00000004891  | Nes      | 0.003385 | -5.59968 | 4.90E-11 | 0.039585 | -2.63791 | 5.25E-02 | 0.053568 | -2.42025 | 1.49E-03 | 0.004613 | -5.05584 | 2.03E-06 | 0.036639 | -2.91692 | 2.65E-04 | 1.439146 | 5.717729 | 3.80E-39 |
| ENSMUSG00000022468  | Endou    | 0        | -6.25971 | 1.46E-09 | 0.006597 | -4.1203  | 1.59E-02 | 0.011479 | -4.02472 | 4.32E-05 | 0.018453 | -3.37361 | 1.31E-03 | 0.004071 | -4.92606 | 5.29E-06 | 1.200013 | 7.134503 | 3.49E-40 |
| ENSMUSG00000062515  | Fabp4    | 0.081246 | -5.39556 | 2.37E-14 | 0.197923 | -3.94866 | 2.44E-03 | 0.187488 | -4.16657 | 1.33E-07 | 0.40136  | -3.01281 | 3.01E-04 | 0.199478 | -4.05775 | 1.55E-07 | 16.13931 | 6.294168 | 3.59E-52 |
| ENSMUSG00000040624  | Plekhg1  | 0.003385 | -5.68104 | 1.77E-12 | 0.013195 | -3.95795 | 2.44E-03 | 0.038263 | -2.96752 | 3.97E-05 | 0.04152  | -2.78481 | 5.15E-04 | 0.020355 | -3.75233 | 1.68E-06 | 1.547843 | 6.015115 | 2.00E-47 |
| ENSMUSG00000068735  | Trp53i11 | 0.013541 | -4.13106 | 2.70E-09 | 0.046182 | -2.30533 | 6.37E-02 | 0.049742 | -2.38559 | 7.36E-04 | 0.046133 | -2.42299 | 2.31E-03 | 0.032568 | -2.9367  | 7.89E-05 | 1.252188 | 5.09135  | 6.92E-37 |
| ENSMUSG00000059588  | Calclr   | 0.013541 | -4.61711 | 1.22E-09 | 0.079169 | -2.07882 | 1.52E-01 | 0.084178 | -2.13786 | 5.52E-03 | 0.073813 | -2.26943 | 9.58E-03 | 0.056994 | -2.6717  | 8.48E-04 | 1.708715 | 4.856217 | 2.53E-30 |
| ENSMUSG000000020689 | Itgb3    | 0.013541 | -4.13106 | 1.68E-08 | 0.052779 | -2.13095 | 1.23E-01 | 0.076526 | -1.76851 | 2.17E-02 | 0.078427 | -1.68069 | 6.06E-02 | 0.044781 | -2.5082  | 1.53E-03 | 1.173926 | 4.494101 | 4.56E-27 |
| ENSMUSG00000020674  | Pxdn     | 0.00677  | -4.5483  | 2.01E-09 | 0.013195 | -3.41394 | 1.07E-02 | 0.03061  | -2.71013 | 2.59E-04 | 0.01384  | -3.5839  | 7.31E-05 | 0.024426 | -2.97511 | 1.33E-04 | 1.052186 | 5.80807  | 1.03E-41 |
| ENSMUSG00000048960  | Prex2    | 0.023697 | -3.31901 | 8.41E-07 | 0.02639  | -2.87717 | 3.19E-02 | 0.049742 | -2.26253 | 2.69E-03 | 0.032293 | -2.77516 | 1.47E-03 | 0.036639 | -2.65876 | 7.89E-04 | 1.147839 | 5.034986 | 9.11E-33 |
| ENSMUSG00000021759  | Plpp1    | 0.074475 | -4.71519 | 1.33E-13 | 0.197923 | -3.14507 | 6.94E-03 | 0.183662 | -3.38753 | 1.26E-06 | 0.15224  | -3.60038 | 4.45E-06 | 0.24833  | -2.93078 | 1.94E-05 | 9.052274 | 5.759806 | 6.45E-51 |
| ENSMUSG00000024538  | Ppic     | 0.020311 | -4.05071 | 1.38E-09 | 0.039585 | -2.91635 | 1.66E-02 | 0.045915 | -2.91771 | 4.49E-05 | 0.064587 | -2.38042 | 2.45E-03 | 0.08142  | -2.08973 | 3.67E-03 | 1.652192 | 5.033693 | 3.16E-37 |
| ENSMUSG00000018593  | Sparc    | 0.575492 | -4.05526 | 2.49E-13 | 1.233719 | -2.78185 | 7.97E-03 | 1.49225  | -2.61208 | 2.12E-05 | 1.642346 | -2.42397 | 4.25E-04 | 1.766806 | -2.34329 | 1.71E-04 | 40.1874  | 4.930151 | 9.86E-15 |
| ENSMUSG00000006386  | Tek      | 0.013541 | -4.10434 | 6.73E-09 | 0.052779 | -2.10389 | 1.02E-01 | 0.011479 | -4.21097 | 8.37E-07 | 0        | -5.90029 | 2.09E-07 | 0.020355 | -3.5082  | 1.11E-05 | 1.321754 | 6.203037 | 3.22E-46 |
| ENSMUSG00000024754  | Tmem2    | 0.196344 | -2.23261 | 1.40E-05 | 0.270495 | -1.61208 | 1.76E-01 | 0.206619 | -2.11968 | 5.24E-04 | 0.073813 | -3.54133 | 1.56E-06 | 0.211691 | -2.06707 | 1.07E-03 | 3.786999 | 4.316458 | 2.84E-34 |
| ENSMUSG00000070348  | Ccnd1    | 0.622885 | -2.1081  | 8.33E-06 | 0.92364  | -1.38674 | 2.29E-01 | 0.635163 | -2.04469 | 2.77E-04 | 0.507466 | -2.33664 | 2.38E-04 | 1.127662 | -1.14615 | 8.82E-02 | 9.926197 | 3.721959 | 6.85E-29 |
| ENSMUSG00000002504  | Slc9a3r2 | 0.121869 | -2.3354  | 6.91E-06 | 0.237507 | -1.20104 | 4.17E-01 | 0.19514  | -1.59325 | 1.09E-02 | 0.101493 | -2.50613 | 3.42E-04 | 0.236117 | -1.28734 | 6.57E-02 | 2.300026 | 3.720112 | 1.13E-25 |

|                     |                   |          |          |          |          |          |          |          |          |          |          |          |          |          |          |          |          |          |          |
|---------------------|-------------------|----------|----------|----------|----------|----------|----------|----------|----------|----------|----------|----------|----------|----------|----------|----------|----------|----------|----------|
| ENSMUSG00000022475  | Hdac7             | 0.115098 | -1.25133 | 2.16E-02 | 0.105559 | -1.23996 | 4.18E-01 | 0.053568 | -2.34385 | 4.05E-04 | 0.092267 | -1.50797 | 5.03E-02 | 0.08142  | -1.72322 | 1.26E-02 | 1.04349  | 3.541333 | 1.89E-21 |
| ENSMUSG00000066571  | 4931406P1<br>6Rik | 0.2065   | -1.30046 | 8.50E-03 | 0.211118 | -1.1475  | 4.10E-01 | 0.114788 | -2.15708 | 2.63E-04 | 0.12456  | -1.98704 | 2.81E-03 | 0.16691  | -1.58349 | 1.14E-02 | 1.908717 | 3.539086 | 8.71E-25 |
| ENSMUSG00000054263  | Lifr              | 0.399459 | -0.95991 | 9.85E-02 | 0.158338 | -2.22551 | 5.78E-02 | 0.210446 | -1.92913 | 3.48E-03 | 0.19376  | -2.00624 | 7.32E-03 | 0.175052 | -2.18679 | 1.30E-03 | 3.039164 | 3.649242 | 3.21E-22 |
| ENSMUSG00000025790  | Slco3a1           | 0.2065   | -1.19549 | 2.26E-02 | 0.072572 | -2.56043 | 1.81E-02 | 0.126267 | -1.91672 | 2.22E-03 | 0.175307 | -1.38172 | 6.74E-02 | 0.134342 | -1.8079  | 5.78E-03 | 1.80002  | 3.572051 | 3.19E-23 |
| ENSMUSG00000032966  | Fkbp1a            | 2.247803 | -0.92107 | 4.18E-02 | 1.319486 | -1.6487  | 7.32E-02 | 1.446335 | -1.59767 | 2.01E-03 | 2.195946 | -0.91317 | 1.94E-01 | 1.774948 | -1.26653 | 2.56E-02 | 13.95233 | 2.917575 | 9.86E-15 |
| ENSMUSG00000020315  | Sptbn1            | 0.958024 | -0.71662 | 1.40E-01 | 0.508002 | -1.60786 | 9.13E-02 | 0.497417 | -1.73462 | 9.62E-04 | 0.516693 | -1.63743 | 6.05E-03 | 0.769415 | -1.04373 | 9.92E-02 | 5.360929 | 2.982459 | 1.77E-20 |
| ENSMUSG00000039081  | Zfp503            | 0.013541 | -3.844   | 2.97E-07 | 0.006597 | -4.04763 | 7.91E-03 | 0.007653 | -4.37191 | 3.54E-06 | 0.023067 | -3.03172 | 1.17E-03 | 0.052923 | -1.98069 | 1.96E-02 | 1.069577 | 5.590617 | 5.24E-35 |
| ENSMUSG00000063415  | Cyp26b1           | 0.003385 | -5.26976 | 7.28E-08 | 0        | -5.14041 | 8.59E-03 | 0.007653 | -4.46    | 3.74E-05 | 0.018453 | -3.38888 | 2.56E-03 | 0.016284 | -3.60413 | 4.82E-04 | 1.204361 | 6.876668 | 1.91E-35 |
| ENSMUSG00000074785  | Plxnc1            | 0.044008 | -4.21432 | 6.57E-10 | 0.039585 | -4.09034 | 2.44E-03 | 0.061221 | -3.70997 | 2.39E-06 | 0.147627 | -2.4049  | 3.99E-03 | 0.142484 | -2.49006 | 1.06E-03 | 3.826129 | 5.439187 | 2.04E-39 |
| ENSMUSG00000020044  | Timp3             | 0.044008 | -4.00673 | 6.49E-10 | 0.059377 | -3.36465 | 7.04E-03 | 0.049742 | -3.78695 | 7.39E-07 | 0.17992  | -1.90295 | 1.83E-02 | 0.08142  | -3.08109 | 2.55E-05 | 3.295689 | 5.34079  | 6.12E-41 |
| ENSMUSG00000004044  | Ptrf              | 0.081246 | -2.60319 | 3.27E-06 | 0.105559 | -2.04544 | 8.52E-02 | 0.099483 | -2.26728 | 5.60E-04 | 0.17992  | -1.34259 | 9.32E-02 | 0.150626 | -1.63705 | 2.02E-02 | 1.947848 | 3.99339  | 7.59E-27 |
| ENSMUSG00000071042  | Rasgrp3           | 0.037238 | -3.76043 | 2.50E-09 | 0.006597 | -5.23461 | 1.94E-04 | 0.011479 | -5.1445  | 3.27E-09 | 0.147627 | -1.70635 | 3.20E-02 | 0.061065 | -3.00725 | 2.61E-05 | 2.41307  | 5.48435  | 5.86E-44 |
| ENSMUSG00000029581  | Fscn1             | 0.016926 | -4.2428  | 2.08E-09 | 0.032987 | -3.10844 | 1.72E-02 | 0.011479 | -4.61477 | 1.81E-07 | 0.147627 | -1.14459 | 2.43E-01 | 0.052923 | -2.66432 | 4.41E-04 | 1.608713 | 4.995322 | 3.50E-34 |
| ENSMUSG00000072235  | Tuba1a            | 0.148951 | -2.53872 | 3.91E-06 | 0.145143 | -2.40481 | 3.40E-02 | 0.118615 | -2.82988 | 2.12E-05 | 0.438266 | -0.82434 | 4.35E-01 | 0.256472 | -1.67361 | 1.64E-02 | 3.321776 | 3.922005 | 5.46E-26 |
| ENSMUSG00000017309  | Cd300lg           | 0.010156 | -4.25466 | 7.15E-09 | 0.013195 | -3.54039 | 9.53E-03 | 0.007653 | -4.45497 | 7.77E-07 | 0.0692   | -1.64875 | 5.52E-02 | 0.069207 | -1.68346 | 3.44E-02 | 1.078273 | 4.980763 | 4.70E-33 |
| ENSMUSG00000054435  | Gimap4            | 0.057549 | -4.29076 | 6.54E-13 | 0.098961 | -3.32852 | 2.43E-03 | 0.088005 | -3.64934 | 8.42E-08 | 0.29064  | -1.86547 | 9.00E-03 | 0.370459 | -1.52496 | 2.50E-02 | 4.878315 | 4.761586 | 6.27E-40 |
| ENSMUSG00000032035  | Ets1              | 0.081246 | -3.66909 | 1.71E-10 | 0.131949 | -2.79112 | 1.07E-02 | 0.130094 | -2.95167 | 6.34E-06 | 0.336773 | -1.49882 | 4.71E-02 | 0.301253 | -1.69344 | 1.19E-02 | 4.282656 | 4.467954 | 6.05E-35 |
| ENSMUSG00000047867  | Gimap6            | 0.010156 | -5.29213 | 1.61E-13 | 0.032987 | -3.56787 | 0.002655 | 0.049742 | -3.24012 | 4.14E-06 | 0.2076   | -1.11724 | 0.199541 | 0.109916 | -2.09574 | 0.001997 | 2.14785  | 4.739385 | 1.85E-36 |
| ENSMUSG00000030653  | Pde2a             | 0.050779 | -4.12359 | 7.81E-13 | 0.131949 | -2.58997 | 0.012015 | 0.126267 | -2.79118 | 6.57E-06 | 0.350613 | -1.22584 | 0.103763 | 0.346033 | -1.2683  | 0.065148 | 3.591344 | 4.188943 | 2.08E-33 |
| ENSMUSG00000043505  | Gimap5            | 0.010156 | -4.43969 | 9.65E-09 | 0.02639  | -2.97894 | 0.033634 | 0.034437 | -2.87101 | 0.000331 | 0.133787 | -0.86827 | 0.485864 | 0.113987 | -1.13726 | 0.279124 | 1.100012 | 4.121921 | 4.12E-22 |
| ENSMUSG00000022440  | C1qtnf6           | 0.037238 | -2.75328 | 4.96E-06 | 0.019792 | -3.2416  | 0.009936 | 0.049742 | -2.30152 | 0.001035 | 0.101493 | -1.2173  | 0.163796 | 0.122129 | -0.9617  | 0.306073 | 1.013055 | 3.891126 | 8.73E-24 |
| ENSMUSG00000038587  | Akap12            | 0.016926 | -4.19083 | 1.76E-08 | 0.032987 | -3.05647 | 0.030249 | 0.026784 | -3.54894 | 2.43E-05 | 0.106107 | -1.58205 | 0.096036 | 0.016284 | -4.12879 | 3.4E-06  | 1.604366 | 5.382218 | 1.47E-34 |
| ENSMUSG00000032060  | Cryab             | 0.077861 | -1.90719 | 0.014488 | 0.105559 | -1.30008 | 0.741581 | 0.141572 | -0.96305 | 0.528018 | 0.147627 | -0.86474 | 0.635226 | 0.069207 | -2.01917 | 0.057339 | 1.013055 | 3.235774 | 2.31E-10 |
| ENSMUSG000000067925 | Cxx1a             | 0.192959 | -1.46344 | 0.002064 | 0.151741 | -1.68201 | 0.100581 | 0.214272 | -1.27117 | 0.034679 | 0.419813 | -0.16942 | 1        | 0.219833 | -1.2187  | 0.05845  | 1.617409 | 2.74617  | 1.24E-15 |
| ENSMUSG00000024074  | Crim1             | 0.260664 | -1.14311 | 0.016898 | 0.448625 | -0.20568 | 1        | 0.290797 | -0.94419 | 0.16199  | 0.156853 | -1.84877 | 0.00365  | 0.240188 | -1.23285 | 0.052083 | 1.760889 | 2.708817 | 2.74E-15 |
| ENSMUSG00000079018  | Ly6c1             | 0.088016 | -3.3006  | 2.84E-05 | 0.059377 | -3.62369 | 0.038539 | 0.022958 | -5.05712 | 1.84E-06 | 0.80272  | 0.172414 | 0.919512 | 0.044781 | -4.16356 | 3.72E-05 | 3.443516 | 4.147318 | 3.86E-17 |
| ENSMUSG00000019647  | Sema6a            | 0.088016 | -1.72433 | 0.002831 | 0.019792 | -3.44121 | 0.007852 | 0        | -6.3679  | 2.66E-09 | 0.023067 | -3.43863 | 6.74E-05 | 0.016284 | -3.92098 | 1.3E-06  | 1.39132  | 5.383716 | 1.05E-39 |
| ENSMUSG00000045092  | S1pr1             | 0.368992 | -0.27268 | 0.775406 | 0.046182 | -3.18948 | 0.003803 | 0.011479 | -5.11368 | 6.15E-10 | 0.09688  | -2.28638 | 0.001133 | 0.073278 | -2.72053 | 2.64E-05 | 1.939152 | 3.833937 | 5.68E-27 |
| ENSMUSG00000024501  | Dpysl3            | 0.14218  | -1.18533 | 0.040377 | 0.019792 | -3.62369 | 0.004604 | 0.022958 | -3.72016 | 1.73E-06 | 0.078427 | -1.9934  | 0.012015 | 0.077349 | -2.04922 | 0.004666 | 1.386972 | 4.205186 | 3.55E-27 |
| ENSMUSG000000000058 | Cav2              | 0.162492 | -0.81156 | 0.171969 | 0.039585 | -2.66195 | 0.02426  | 0.026784 | -3.3799  | 4.75E-06 | 0.0692   | -2.0236  | 0.008058 | 0.097704 | -1.55783 | 0.031244 | 1.16523  | 3.75594  | 2.59E-23 |
| ENSMUSG00000007655  | Cav1              | 0.07109  | -1.84986 | 0.03192  | 0.006597 | -4.26926 | 0.040227 | 0.03061  | -2.9816  | 0.005427 | 0.170693 | -0.43735 | 1        | 0.065136 | -1.91739 | 0.123134 | 1.013055 | 3.820737 | 1.77E-12 |
| ENSMUSG00000020186  | Csrp2             | 0.541639 | -0.38547 | 0.722916 | 0.039585 | -4.03311 | 0.005041 | 0.076526 | -3.34105 | 3.46E-05 | 0.37368  | -0.95333 | 0.452713 | 0.321607 | -1.20753 | 0.24824  | 2.600029 | 3.13031  | 1.16E-12 |
| ENSMUSG00000058254  | Tspan7            | 0.081246 | -3.10883 | 7.9E-07  | 0.059377 | -3.32303 | 0.010666 | 0.011479 | -5.57006 | 2.66E-09 | 0.01384  | -5.24599 | 1.36E-07 | 0.048852 | -3.74499 | 2.05E-06 | 3.378298 | 6.245876 | 1.04E-48 |
| ENSMUSG00000021944  | Gata4             | 0.084631 | -1.90322 | 0.001454 | 0.039585 | -2.73555 | 0.033616 | 0.015305 | -4.14309 | 1.11E-06 | 0.01384  | -4.1447  | 1.05E-05 | 0.012213 | -4.35995 | 4.11E-07 | 1.504365 | 5.389164 | 4.23E-38 |
| ENSMUSG000000031503 | Col4a2            | 0.240352 | -1.81713 | 0.000488 | 0.118754 | -2.68334 | 0.01352  | 0.141572 | -2.57024 | 5.04E-05 | 0.046133 | -4.07384 | 2.4E-07  | 0.097704 | -3.08448 | 2.88E-06 | 3.726128 | 4.756606 | 2.18E-39 |
| ENSMUSG00000031502  | Col4a1            | 0.517942 | -1.64041 | 0.001135 | 0.296884 | -2.3337  | 0.026274 | 0.352018 | -2.19655 | 0.000278 | 0.087653 | -4.14545 | 2.93E-08 | 0.215762 | -2.90205 | 3.4E-06  | 6.878337 | 4.467309 | 3.39E-37 |
| ENSMUSG00000022893  | Adamts1           | 0.209885 | -1.22585 | 0.079705 | 0.065974 | -2.73967 | 0.072368 | 0.042089 | -3.52632 | 4.03E-05 | 0.023067 | -4.21658 | 3.8E-05  | 0.077349 | -2.6612  | 0.001931 | 2.191329 | 4.567941 | 1.10E-24 |
| ENSMUSG00000051236  | Msrb3             | 0.13541  | -0.88695 | 0.113723 | 0.059377 | -1.93817 | 0.098889 | 0.026784 | -3.18384 | 7.92E-06 | 0.023067 | -3.28391 | 4.45E-05 | 0.04071  | -2.60182 | 0.000159 | 1.091316 | 4.150044 | 5.81E-29 |
| ENSMUSG00000026181  | Ppm1f             | 0.223426 | -0.59217 | 0.315631 | 0.131949 | -1.29768 | 0.32672  | 0.072699 | -2.28605 | 0.000218 | 0.046133 | -2.85478 | 7.08E-05 | 0.113987 | -1.61022 | 0.01303  | 1.300014 | 3.401583 | 5.07E-22 |
| ENSMUSG00000024238  | Zeb1              | 0.230197 | -0.30873 | 0.683442 | 0.118754 | -1.24503 | 0.355382 | 0.088005 | -1.80289 | 0.003491 | 0.08304  | -1.83554 | 0.008287 | 0.089562 | -1.75943 | 0.006115 | 1.030446 | 3.008688 | 2.91E-17 |
| ENSMUSG00000038145  | Snrk              | 0.582262 | -0.51852 | 0.342274 | 0.395846 | -1.05294 | 0.417699 | 0.317581 | -1.47358 | 0.006843 | 0.253733 | -1.77377 | 0.003292 | 0.329749 | -1.40237 | 0.015298 | 2.804379 | 2.857901 | 2.41E-18 |
| ENSMUSG00000010047  | Hyal2             | 0.399459 | -0.35984 | 0.600032 | 0.303482 | -0.73732 | 0.788299 | 0.19514  | -1.49477 | 0.011615 | 0.106107 | -2.34824 | 0.000369 | 0.170981 | -1.68036 | 0.005566 | 1.769585 | 2.880688 | 9.94E-17 |
| ENSMUSG00000017615  | Tnfaip1           | 0.572106 | -0.39089 | 0.520006 | 0.415638 | -0.83892 | 0.633488 | 0.348192 | -1.18622 | 0.040348 | 0.19376  | -2.03511 | 0.000755 | 0.317537 | -1.31764 | 0.024875 | 2.421766 | 2.672395 | 6.28E-16 |
| ENSMUSG00000021756  | Il6st             | 1.130672 | -0.27883 | 0.743389 | 0.69273  | -1.0074  | 0.546964 | 0.70021  | -1.0604  | 0.113824 | 0.31832  | -2.22599 | 0.000607 | 0.549582 | -1.42861 | 0.023418 | 4.452223 | 2.652354 | 6.35E-14 |

|         |                     |          |          |          |          |          |          |          |          |          |          |          |          |          |          |          |          |          |          |          |
|---------|---------------------|----------|----------|----------|----------|----------|----------|----------|----------|----------|----------|----------|----------|----------|----------|----------|----------|----------|----------|----------|
| Group 2 | ENSMUSG00000028517  | Plpp3    | 1.11036  | -0.56603 | 0.316673 | 0.613561 | -1.41441 | 0.205978 | 0.470633 | -1.90814 | 0.000635 | 0.08304  | -4.36334 | 6.35E-10 | 0.309395 | -2.51987 | 1.03E-05 | 6.552247 | 3.581438 | 3.77E-27 |
|         | ENSMUSG00000030352  | Tspan9   | 0.352065 | -0.19937 | 0.85113  | 0.138546 | -1.56404 | 0.142711 | 0.19514  | -1.15403 | 0.066403 | 0.04152  | -3.32417 | 2.17E-06 | 0.154697 | -1.49706 | 0.014274 | 1.434799 | 2.906022 | 1.66E-17 |
|         | ENSMUSG00000031217  | Efnb1    | 0.230197 | -0.41758 | 0.548506 | 0.250702 | -0.22697 | 1        | 0.091831 | -1.83611 | 0.003206 | 0.08304  | -1.93011 | 0.00606  | 0.085491 | -1.92283 | 0.003085 | 1.052186 | 2.858111 | 4.34E-15 |
|         | ENSMUSG00000045954  | Sdpr     | 0.203115 | -1.90042 | 0.001317 | 0.032987 | -4.20229 | 0.001565 | 0.026784 | -4.69864 | 2.6E-08  | 0.0692   | -3.36173 | 6.77E-05 | 0.036639 | -4.26469 | 9.61E-08 | 3.534822 | 5.411661 | 2.31E-40 |
|         | ENSMUSG00000074457  | S100a16  | 0.582262 | -0.84388 | 0.118982 | 0.092364 | -3.42163 | 0.001215 | 0.065047 | -4.06988 | 2.66E-09 | 0.115333 | -3.20649 | 5.19E-06 | 0.08142  | -3.73537 | 8E-09    | 4.7044   | 4.463505 | 1.24E-37 |
|         | ENSMUSG00000033174  | Mgll     | 0.324983 | -0.80599 | 0.152978 | 0.052779 | -3.28941 | 0.00293  | 0.061221 | -3.27035 | 1.26E-06 | 0.0692   | -3.03577 | 3.76E-05 | 0.061065 | -3.25102 | 1.15E-06 | 2.513071 | 4.281704 | 1.17E-32 |
|         | ENSMUSG00000027800  | Tm4sf1   | 0.189574 | -1.54772 | 0.012586 | 0.019792 | -4.36422 | 0.0022   | 0.053568 | -3.34821 | 2.02E-05 | 0.02768  | -4.14095 | 9.57E-06 | 0.024426 | -4.3562  | 3.12E-07 | 2.573942 | 5.128313 | 2.14E-34 |
|         | ENSMUSG00000037166  | Ppp1r14a | 0.301287 | -0.46907 | 0.530186 | 0.039585 | -3.25616 | 0.007039 | 0.084178 | -2.41178 | 0.000373 | 0.078427 | -2.45484 | 0.001342 | 0.077349 | -2.5127  | 0.000328 | 1.73915  | 3.723361 | 2.01E-22 |
|         | ENSMUSG00000029710  | Ephb4    | 0.233582 | -0.72878 | 0.235227 | 0.059377 | -2.589   | 0.026274 | 0.019131 | -4.2522  | 7.78E-08 | 0.009227 | -4.93681 | 1.27E-07 | 0.012213 | -4.73413 | 5.23E-09 | 1.795672 | 4.560443 | 2.05E-33 |
|         | ENSMUSG00000032548  | Slco2a1  | 0.453623 | -0.63035 | 0.291514 | 0.112156 | -2.60452 | 0.013861 | 0.126267 | -2.57559 | 3.6E-05  | 0.050747 | -3.78961 | 5.91E-07 | 0.089562 | -3.04858 | 2.21E-06 | 3.026121 | 4.01952  | 8.21E-30 |
|         | ENSMUSG00000030551  | Nr2f2    | 0.473934 | -0.57316 | 0.365944 | 0.138546 | -2.32303 | 0.034281 | 0.19514  | -1.9478  | 0.002004 | 0.04152  | -4.07011 | 2.73E-07 | 0.085491 | -3.12879 | 2.3E-06  | 2.956555 | 3.829388 | 4.21E-26 |
|         | ENSMUSG00000027803  | Wwtr1    | 0.247123 | -0.20327 | 0.882116 | 0.032987 | -2.97297 | 0.010284 | 0.057394 | -2.43465 | 0.000211 | 0.02768  | -3.33735 | 2.86E-05 | 0.032568 | -3.18251 | 6.62E-06 | 1.230448 | 3.737549 | 4.13E-24 |
|         | ENSMUSG00000027663  | Zmat3    | 0.578877 | 0.061983 | 0.932432 | 0.158338 | -1.89527 | 0.063265 | 0.172183 | -1.88983 | 0.001081 | 0.101493 | -2.60986 | 8.48E-05 | 0.130271 | -2.28526 | 0.000122 | 2.134806 | 3.080633 | 2.62E-19 |
|         | ENSMUSG00000024140  | Epas1    | 0.788762 | 0.252857 | 0.584912 | 0.184728 | -1.98094 | 0.040489 | 0.229577 | -1.77269 | 0.001568 | 0.156853 | -2.29089 | 0.0003   | 0.134342 | -2.54951 | 9.94E-06 | 2.508723 | 2.913989 | 5.35E-18 |
|         | ENSMUSG00000058173  | Smco4    | 1.015573 | 0.182496 | 0.717827 | 0.184728 | -2.409   | 0.01877  | 0.149225 | -2.847   | 3.97E-06 | 0.106107 | -3.27823 | 3.22E-06 | 0.362317 | -1.50941 | 0.019258 | 3.521778 | 3.099357 | 2.15E-18 |
|         | ENSMUSG00000031523  | Dlc1     | 0.988491 | 0.232281 | 0.624104 | 0.092364 | -3.29819 | 0.001138 | 0.072699 | -3.79175 | 5.98E-09 | 0.036907 | -4.63281 | 1.18E-09 | 0.08142  | -3.61134 | 7.1E-09  | 3.778303 | 3.639955 | 8.88E-27 |
|         | ENSMUSG00000041261  | Car8     | 0.517942 | 0.813801 | 0.064951 | 0.039585 | -3.04687 | 0.011277 | 0.034437 | -3.43771 | 3E-06    | 0.01384  | -4.45384 | 8.32E-07 | 0.024426 | -3.85263 | 4.38E-07 | 1.313058 | 3.11013  | 1.05E-15 |
|         | ENSMUSG00000030516  | Tjp1     | 0.436697 | 0.38337  | 0.419133 | 0.032987 | -3.33471 | 0.00293  | 0.015305 | -4.51523 | 6.85E-09 | 0.018453 | -4.19116 | 3.9E-07  | 0.028497 | -3.7196  | 1.33E-07 | 1.526104 | 3.573302 | 2.76E-23 |
|         | ENSMUSG00000035184  | Fam124a  | 0.470549 | 0.810276 | 0.052246 | 0.052779 | -2.54039 | 0.019993 | 0.026784 | -3.62825 | 4.49E-07 | 0.023067 | -3.72591 | 3.41E-06 | 0.048852 | -2.80212 | 2.67E-05 | 1.152187 | 2.971707 | 5.34E-16 |
|         | ENSMUSG00000037712  | Fermt2   | 0.744754 | 0.619285 | 0.125666 | 0.112156 | -2.32694 | 0.01767  | 0.107136 | -2.53185 | 1.71E-05 | 0.073813 | -3.00186 | 9.62E-06 | 0.069207 | -3.13269 | 3.12E-07 | 1.991326 | 2.961038 | 5.30E-18 |
|         | ENSMUSG00000034738  | Nostrin  | 0.504401 | 0.517955 | 0.242442 | 0.059377 | -2.69612 | 0.010529 | 0.038263 | -3.47047 | 2.99E-07 | 0.0692   | -2.59216 | 0.000198 | 0.08142  | -2.40129 | 0.000129 | 1.460886 | 3.066869 | 4.66E-18 |
|         | ENSMUSG00000015094  | Npdc1    | 0.463779 | 0.247134 | 0.623892 | 0.052779 | -2.93255 | 0.005041 | 0.061221 | -2.90894 | 4.31E-06 | 0.08304  | -2.4192  | 0.000406 | 0.052923 | -3.088   | 1.53E-06 | 1.643496 | 3.316286 | 2.07E-21 |
|         | ENSMUSG00000023067  | Cdkn1a   | 4.163851 | 0.386878 | 0.411315 | 0.738912 | -2.32272 | 0.014989 | 0.742299 | -2.42438 | 1.74E-05 | 0.807333 | -2.25422 | 0.000347 | 0.66357  | -2.57513 | 6.51E-06 | 12.47405 | 2.956849 | 9.86E-15 |
|         | ENSMUSG00000041801  | Phlda3   | 0.826    | 0.553711 | 0.206157 | 0.072572 | -3.12198 | 0.003309 | 0.099483 | -2.84113 | 7.31E-06 | 0.087653 | -2.96198 | 3.18E-05 | 0.109916 | -2.67813 | 2.25E-05 | 2.343504 | 3.061953 | 1.72E-17 |
|         | ENSMUSG000000047907 | Tshz2    | 0.47732  | 0.582303 | 0.183492 | 0.059377 | -2.56836 | 0.015673 | 0.095657 | -2.05613 | 0.000829 | 0.073813 | -2.37241 | 0.000677 | 0.097704 | -2.00696 | 0.001665 | 1.213057 | 2.717085 | 9.03E-14 |
|         | ENSMUSG00000028445  | Enho     | 0.734598 | 0.926879 | 0.015252 | 0.079169 | -2.5711  | 0.011068 | 0.053568 | -3.27466 | 3.34E-07 | 0.115333 | -2.13167 | 0.001258 | 0.020355 | -4.5082  | 1.3E-10  | 1.613061 | 2.783816 | 1.98E-15 |
|         | ENSMUSG00000097312  | Gm26870  | 0.934328 | 1.313464 | 0.1099   | 0.02639  | -4.06982 | 0.567794 | 0.015305 | -4.98439 | 0.014363 | 0.046133 | -3.51019 | 0.186163 | 0.052923 | -3.37115 | 0.15487  | 1.669584 | 2.664617 | 2.09E-03 |
|         | ENSMUSG00000041012  | Cmtm8    | 1.123901 | 1.186782 | 0.00089  | 0.065974 | -3.2676  | 0.001062 | 0.026784 | -4.64659 | 1.1E-10  | 0.092267 | -2.90851 | 1.05E-05 | 0.089562 | -2.98914 | 5.12E-07 | 2.113067 | 2.655757 | 1.13E-14 |
| Group 3 | ENSMUSG00000027074  | Slc43a3  | 0.027082 | -4.21068 | 2.54E-11 | 0.046182 | -3.24857 | 0.00468  | 0.080352 | -2.67092 | 4.86E-05 | 0.073813 | -2.73062 | 0.000243 | 0.350104 | -0.41576 | 0.864879 | 2.134806 | 4.166263 | 1.24E-29 |
|         | ENSMUSG00000001029  | Icam2    | 0.027082 | -4.8338  | 6.91E-15 | 0.125351 | -2.53077 | 0.014833 | 0.202793 | -1.95964 | 0.001143 | 0.309093 | -1.2807  | 0.085963 | 0.512944 | -0.4968  | 0.745919 | 3.008729 | 3.681369 | 8.54E-26 |
|         | ENSMUSG00000016494  | Cd34     | 0.010156 | -5.00673 | 4.99E-10 | 0.032987 | -3.28138 | 0.022382 | 0.03061  | -3.60192 | 2.05E-05 | 0.239893 | -0.57961 | 0.778509 | 0.056994 | -2.73779 | 0.000923 | 1.73915  | 4.615108 | 1.59E-26 |
|         | ENSMUSG00000026656  | Fcgr2b   | 0.094787 | -4.53475 | 5.67E-15 | 0.178131 | -3.4516  | 0.001108 | 0.306103 | -2.80289 | 6.33E-06 | 2.232852 | 0.362333 | 0.634418 | 0.606576 | -1.76401 | 0.005669 | 7.687042 | 3.544568 | 1.96E-23 |
|         | ENSMUSG00000000184  | Ccnd2    | 0.081246 | -4.74369 | 4.17E-16 | 0.389248 | -2.32596 | 0.024422 | 0.474459 | -2.14309 | 0.000316 | 1.102586 | -0.80708 | 0.392771 | 0.586221 | -1.80807 | 0.003709 | 8.404441 | 4.053047 | 1.84E-31 |
|         | ENSMUSG00000027435  | Cd93     | 0.040623 | -5.20917 | 1.78E-17 | 0.138546 | -3.30857 | 0.001335 | 0.260187 | -2.53558 | 2.4E-05  | 1.097973 | -0.27075 | 0.982351 | 0.341962 | -2.11255 | 0.000533 | 6.01311  | 4.049397 | 1.17E-31 |
|         | ENSMUSG000000001506 | Col1a1   | 0.030467 | -5.36756 | 0.039858 | 0.20452  | -2.53439 | 1        | 0.260187 | -2.30486 | 0.79675  | 0.9688   | -0.22291 | 0.931729 | 0.439666 | -1.49691 | 1        | 4.882663 | 3.739023 | 5.64E-04 |
|         | ENSMUSG000000029661 | Col1a2   | 0.060934 | -4.97862 | 0.030933 | 0.369456 | -2.23457 | 1        | 0.378802 | -2.30967 | 0.72436  | 1.416293 | -0.21624 | 0.946812 | 0.708351 | -1.34239 | 1        | 6.952251 | 3.631194 | 4.19E-04 |
|         | ENSMUSG00000025969  | Nrp2     | 0.074475 | -3.59309 | 3.01E-11 | 0.164936 | -2.27767 | 0.02426  | 0.378802 | -1.14159 | 0.082846 | 0.60896  | -0.35558 | 0.879736 | 0.386743 | -1.09767 | 0.125071 | 2.973946 | 3.215755 | 1.92E-20 |
|         | ENSMUSG00000030787  | Lyve1    | 0.016926 | -5.27975 | 3.13E-11 | 0.013195 | -5.15036 | 0.000995 | 0.034437 | -4.31635 | 1.03E-06 | 0.239893 | -1.51282 | 0.135611 | 0.350104 | -0.95218 | 0.466004 | 3.13047  | 4.56042  | 5.44E-26 |
|         | ENSMUSG00000020473  | Aebp1    | 0.010156 | -4.65826 | 0.000232 | 0.013195 | -3.94276 | 0.25499  | 0.026784 | -3.42309 | 0.023995 | 0.253733 | -0.09293 | 1        | 0.162839 | -0.82308 | 0.929576 | 1.182622 | 3.680559 | 9.14E-08 |
|         | ENSMUSG00000025026  | Add3     | 0.084631 | -2.95207 | 1.67E-08 | 0.118754 | -2.28361 | 0.024933 | 0.091831 | -2.79079 | 5.91E-06 | 0.461333 | -0.29866 | 0.944079 | 0.460021 | -0.31121 | 0.944929 | 2.152198 | 3.162459 | 1.30E-19 |
|         | ENSMUSG00000090019  | Gimap1   | 0.010156 | -4.5219  | 2.08E-08 | 0.059377 | -2.04016 | 0.205796 | 0.015305 | -3.97598 | 1.41E-05 | 0.267573 | 0.156728 | 0.948211 | 0.162839 | -0.67107 | 0.72222  | 1.004359 | 3.35518  | 6.07E-14 |
|         | ENSMUSG00000026817  | Ak1      | 0.003385 | -5.72555 | 5.2E-11  | 0.059377 | -2.23974 | 0.120924 | 0.076526 | -2.04233 | 0.009437 | 0.0692   | -2.12964 | 0.016622 | 0.101775 | -1.60607 | 0.06241  | 1.413059 | 4.54167  | 2.15E-26 |
|         | ENSMUSG00000026814  | Eng      | 0.044008 | -5.00329 | 6.85E-16 | 0.171533 | -2.91017 | 0.006211 | 0.428544 | -1.68285 | 0.007053 | 0.226053 | -2.59161 | 0.000204 | 0.366388 | -1.9064  | 0.002812 | 6.078328 | 4.607994 | 1.48E-38 |
|         | ENSMUSG00000027931  | Npr1     | 0.010156 | -4.84131 | 1.03E-11 | 0.052779 | -2.52007 | 0.03204  | 0.110962 | -1.62422 | 0.017079 | 0.046133 | -2.81423 | 0.000297 | 0.158768 | -1.06402 | 0.217948 | 1.482625 | 4.268689 | 2.00E-29 |
|         | ENSMUSG00000027082  | Tfpi     | 0.013541 | -4.66969 | 1.11E-11 | 0.131949 | -1.41551 | 0.321617 | 0.149225 | -1.33949 | 0.057832 | 0.05536  | -2.72283 | 0.000369 | 0.138413 | -1.43962 | 0.050811 | 1.604366 | 4.092711 | 9.55E-28 |



|                     |           |          |          |          |          |          |          |          |          |          |          |          |          |          |          |          |          |          |          |
|---------------------|-----------|----------|----------|----------|----------|----------|----------|----------|----------|----------|----------|----------|----------|----------|----------|----------|----------|----------|----------|
| ENSMUSG00000074743  | Thbd      | 0.013541 | -4.30929 | 3.66E-09 | 0.092364 | -1.55044 | 0.347484 | 0.10331  | -1.51149 | 0.054776 | 0.059973 | -2.24449 | 0.008239 | 0.101775 | -1.51788 | 0.068608 | 1.260884 | 4.135247 | 6.88E-24 |
| ENSMUSG00000036867  | Smad6     | 0.044008 | -3.39052 | 2.58E-09 | 0.191325 | -1.11387 | 0.486401 | 0.19514  | -1.17397 | 0.08649  | 0.115333 | -1.92164 | 0.006158 | 0.158768 | -1.47722 | 0.028122 | 1.752193 | 3.69712  | 3.28E-25 |
| ENSMUSG00000026335  | Pam       | 0.169262 | -2.2916  | 8.42E-05 | 0.382651 | -0.93459 | 0.778461 | 0.417065 | -0.86854 | 0.389389 | 0.272187 | -1.49929 | 0.080354 | 0.407098 | -0.89766 | 0.409668 | 2.630464 | 3.027442 | 7.59E-14 |
| ENSMUSG00000005973  | Rcn1      | 0.115098 | -2.11776 | 1.32E-05 | 0.20452  | -1.1203  | 0.409568 | 0.244882 | -0.92647 | 0.183498 | 0.184533 | -1.33029 | 0.051534 | 0.264614 | -0.79293 | 0.348516 | 1.591322 | 2.985809 | 2.22E-18 |
| ENSMUSG00000070436  | Serpinh1  | 0.044008 | -4.28684 | 1.63E-09 | 0.290287 | -1.42345 | 0.498822 | 0.294624 | -1.49552 | 0.077006 | 0.364453 | -1.13191 | 0.311005 | 0.236117 | -1.81785 | 0.030242 | 3.308732 | 3.828874 | 2.23E-19 |
| ENSMUSG00000008398  | Elk3      | 0.06432  | -3.92893 | 9.95E-14 | 0.409041 | -1.0836  | 0.41875  | 0.336713 | -1.46502 | 0.009732 | 0.53976  | -0.69433 | 0.442603 | 0.358246 | -1.3562  | 0.024965 | 3.39569  | 3.402967 | 3.95E-25 |
| ENSMUSG00000095098  | Ccdc85b   | 0.074475 | -2.83602 | 3.09E-08 | 0.191325 | -1.30176 | 0.286003 | 0.233403 | -1.09077 | 0.094813 | 0.31832  | -0.57137 | 0.599555 | 0.219833 | -1.17227 | 0.08192  | 1.734802 | 3.103902 | 1.36E-19 |
| ENSMUSG00000020717  | Pecam1    | 0.020311 | -5.79034 | 1.03E-19 | 0.705925 | -0.60398 | 0.929203 | 0.478285 | -1.27673 | 0.037743 | 0.23528  | -2.30779 | 0.000354 | 0.33382  | -1.81616 | 0.0022   | 4.695704 | 3.881681 | 7.77E-31 |
| ENSMUSG00000025279  | Dnase1l3  | 0.054164 | -5.32639 | 5.94E-20 | 1.352473 | -0.48172 | 1        | 1.289457 | -0.59877 | 0.542435 | 0.42904  | -2.27111 | 0.000335 | 0.753131 | -1.44701 | 0.017776 | 7.500083 | 3.386822 | 5.77E-24 |
| ENSMUSG00000028864  | Hgf       | 0.00677  | -5.07712 | 1.9E-11  | 0.290287 | 0.134055 | 1        | 0.153051 | -0.9319  | 0.297868 | 0.073813 | -1.97632 | 0.012591 | 0.113987 | -1.37269 | 0.079248 | 1.082621 | 3.275051 | 5.88E-17 |
| ENSMUSG00000030930  | Chst15    | 0.016926 | -4.65698 | 4.87E-13 | 0.217715 | -0.9468  | 0.634325 | 0.271666 | -0.67303 | 0.489605 | 0.17992  | -1.28663 | 0.090396 | 0.183194 | -1.28385 | 0.069051 | 1.634801 | 3.301197 | 3.62E-20 |
| ENSMUSG00000029163  | Emilin1   | 0.037238 | -4.51628 | 1.22E-14 | 0.382651 | -1.01653 | 0.54118  | 0.642815 | -0.24073 | 0.99813  | 0.336773 | -1.25793 | 0.080233 | 0.419311 | -0.93653 | 0.229489 | 2.704378 | 2.932291 | 5.14E-17 |
| ENSMUSG000000041481 | Serpina3g | 0.057549 | -4.6433  | 4.14E-12 | 0.963224 | -0.36386 | 1        | 1.323894 | 0.159991 | 0.958991 | 0.51208  | -1.3789  | 0.128436 | 0.427453 | -1.67904 | 0.030298 | 4.217438 | 2.762191 | 3.13E-11 |
| ENSMUSG00000024451  | Arap3     | 0.023697 | -3.56744 | 1.57E-09 | 0.184728 | -0.48688 | 1        | 0.198967 | -0.4236  | 0.780056 | 0.050747 | -2.42224 | 0.000589 | 0.118058 | -1.23939 | 0.073032 | 1.013055 | 3.213054 | 1.41E-19 |
| ENSMUSG00000048200  | Cracr2b   | 0.033852 | -3.4119  | 1.26E-09 | 0.211118 | -0.61805 | 0.912769 | 0.225751 | -0.57308 | 0.585603 | 0.106107 | -1.69895 | 0.012459 | 0.1262   | -1.47168 | 0.022056 | 1.265231 | 3.247112 | 1.05E-20 |
| ENSMUSG00000045664  | Cdc42ep2  | 0.037238 | -3.31901 | 1.58E-08 | 0.244105 | -0.43523 | 1        | 0.198967 | -0.81747 | 0.353072 | 0.170693 | -1.02574 | 0.23456  | 0.146555 | -1.28288 | 0.078624 | 1.234796 | 3.054564 | 1.95E-16 |
| ENSMUSG00000030123  | Plxnd1    | 0.132025 | -3.18199 | 6.33E-11 | 0.844471 | -0.26031 | 1        | 0.604553 | -0.83864 | 0.227889 | 0.45672  | -1.25087 | 0.057787 | 0.45595  | -1.27524 | 0.034815 | 3.726128 | 3.018745 | 4.38E-20 |
| ENSMUSG00000019970  | Sgk1      | 0.318213 | -3.01077 | 9.68E-11 | 1.860475 | -0.20345 | 1        | 1.32772  | -0.78418 | 0.268631 | 0.862693 | -1.43446 | 0.020381 | 0.972964 | -1.27002 | 0.031074 | 7.83487  | 2.991455 | 9.86E-15 |
| ENSMUSG00000022799  | Arhgap31  | 0.010156 | -5.61948 | 2.55E-16 | 0.158338 | -1.79938 | 0.098382 | 0.156878 | -1.93068 | 0.001395 | 0.295253 | -0.92808 | 0.271449 | 0.317537 | -0.83159 | 0.348435 | 2.286982 | 3.663249 | 1.11E-25 |
| ENSMUSG00000042286  | Stab1     | 0.104943 | -4.04162 | 4.4E-15  | 0.824678 | -0.85934 | 0.631013 | 0.642815 | -1.31681 | 0.021167 | 1.300959 | -0.15617 | 1        | 0.9119   | -0.75025 | 0.365689 | 5.073969 | 2.833809 | 1.63E-17 |
| ENSMUSG00000022816  | Fstl1     | 0.003385 | -6.08283 | 1.83E-06 | 0.171533 | -1.12049 | 1        | 0.10331  | -1.97959 | 0.203528 | 0.216827 | -0.81652 | 0.893183 | 0.187265 | -1.06527 | 0.745296 | 1.560887 | 3.625089 | 1.52E-08 |
| ENSMUSG00000022665  | Ccdc80    | 0.00677  | -5.7699  | 6.77E-11 | 0.277092 | -0.69656 | 1        | 0.183662 | -1.40745 | 0.141726 | 0.253733 | -0.87276 | 0.563307 | 0.252401 | -0.89987 | 0.548624 | 1.752193 | 3.286655 | 8.02E-13 |
| ENSMUSG00000027669  | Gnb4      | 0.010156 | -4.8975  | 1.93E-13 | 0.217715 | -0.57498 | 0.954291 | 0.191314 | -0.84426 | 0.284614 | 0.212213 | -0.65245 | 0.524579 | 0.154697 | -1.16532 | 0.099619 | 1.204361 | 3.043778 | 5.86E-18 |
| ENSMUSG00000004837  | Grap      | 0.023697 | -3.71822 | 4.68E-10 | 0.211118 | -0.44465 | 1        | 0.168356 | -0.86394 | 0.27775  | 0.19376  | -0.61354 | 0.577437 | 0.175052 | -0.79159 | 0.389787 | 1.004359 | 2.799791 | 8.28E-15 |
| ENSMUSG00000026043  | Col3a1    | 0.067705 | -4.791   | 0.000348 | 0.395846 | -2.09138 | 0.913989 | 0.726994 | -1.26841 | 0.733863 | 1.462426 | -0.11424 | 1        | 1.131733 | -0.54798 | 1        | 5.756586 | 2.956243 | 1.07E-04 |
| ENSMUSG00000086320  | Gm12840   | 0.047393 | -4.82685 | 2.19E-10 | 0.46182  | -1.39788 | 0.570722 | 0.635163 | -0.9852  | 0.407701 | 1.250213 | 0.152094 | 0.933873 | 0.553653 | -1.19186 | 0.29617  | 4.108741 | 2.866442 | 5.97E-10 |
| ENSMUSG00000022122  | Ednrb     | 0.013541 | -5.48354 | 2.37E-12 | 0.112156 | -2.47855 | 0.071926 | 0.141572 | -2.27959 | 0.002418 | 0.715066 | 0.31156  | 0.759256 | 0.606576 | 0.027128 | 1        | 2.069588 | 2.736709 | 3.41E-10 |
| ENSMUSG00000019880  | Rspo3     | 0.003385 | -5.38061 | 0.015055 | 0.059377 | -1.88673 | 1        | 0.114788 | -1.06541 | 1        | 0        | -5.84139 | 0.14576  | 0.036639 | -2.69248 | 0.617601 | 1.139143 | 4.737752 | 1.60E-06 |
| ENSMUSG00000023078  | Cxcl13    | 0.050779 | -4.40019 | 0.17175  | 0.712522 | -0.38712 | 1        | 0.501243 | -0.9968  | 1        | 0.032293 | -4.86547 | 0.640009 | 0.956681 | 0.087651 | 0.871549 | 3.386994 | 2.992917 | 1.35E-02 |
| ENSMUSG00000035459  | Stab2     | 0.091402 | -4.0557  | 6.34E-15 | 1.365667 | 0.12948  | 1        | 0.948918 | -0.48706 | 0.663889 | 0.119947 | -3.56514 | 6.27E-08 | 0.801983 | -0.75659 | 0.363696 | 4.604399 | 2.929013 | 1.29E-18 |
