# Supplementary material for: Single-Cell Transcriptomes Reveal Characteristic Features of Mouse Hepatocytes with Liver Cholestatic Injury
Source: MDPI journal article supplement (doi:10.3390/cells8091069), 2019-09-11
Supplement: s1 [file s1]

Single-cell transcriptomes reveal characteristic features of Mouse Hepatocytes with Cholestasis Injury

Na Chang, Lei Tian, Xiaofang Ji, Xuan Zhou, Lei Hou, Xinhao Zhao, Yuanru Yang, Lin Yang, Liying Li

Supplemental Table 5: High expressed genes of BDL-1 (Related to Supplementary Figure 2)

| EnsemblID          | GeneName | Cluster 1<br>Average | Cluster 1<br>Log2 Fold<br>Change | Cluster 1<br>P-Value | Cluster 2<br>Average | Cluster 2<br>Log2 Fold<br>Change | Cluster 2<br>P-Value | Cluster 3<br>Average | Cluster 3<br>Log2 Fold<br>Change | Cluster 3<br>P-Value | Cluster 4<br>Average | Cluster 4<br>Log2 Fold<br>Change | Cluster 4<br>P-Value | Cluster 5<br>Average | Cluster 5<br>Log2 Fold<br>Change | Cluster 5<br>P-Value | Cluster 6<br>Average | Cluster 6<br>Log2 Fold<br>Change | Cluster 6<br>P-Value |
|--------------------|----------|----------------------|----------------------------------|----------------------|----------------------|----------------------------------|----------------------|----------------------|----------------------------------|----------------------|----------------------|----------------------------------|----------------------|----------------------|----------------------------------|----------------------|----------------------|----------------------------------|----------------------|
| ENSMUSG00000032068 | Plet1    | 1.448885             | 6.323067                         | 1.26E-35             | 0.013195             | -4.18142                         | 1.32E-02             | 0.022958             | -3.8606                          | 4.99E-05             | 0.018453             | -4.02848                         | 2.34E-04             | 0.020355             | -3.97744                         | 5.01E-05             | 0.008696             | -4.87325                         | 4.08E-06             |
| ENSMUSG00000031271 | Serpina7 | 1.922819             | 6.297559                         | 9.47E-42             | 0.032987             | -3.58509                         | 1.35E-02             | 0.022958             | -4.27483                         | 1.88E-06             | 0.036907             | -3.58328                         | 1.65E-04             | 0                    | -6.98798                         | 7.07E-10             | 0.030435             | -3.85698                         | 1.16E-05             |
| ENSMUSG00000044393 | Dsg2     | 1.92959              | 5.73558                          | 5.52E-49             | 0.039585             | -3.39653                         | 3.40E-03             | 0.026784             | -4.11607                         | 5.03E-08             | 0.018453             | -4.47724                         | 1.82E-07             | 0.044781             | -3.41269                         | 1.13E-06             | 0.047827             | -3.29876                         | 2.58E-06             |
| ENSMUSG00000030237 | Slco1a4  | 2.024376             | 5.571985                         | 2.33E-35             | 0.098961             | -2.26469                         | 1.49E-01             | 0.042089             | -3.60343                         | 2.44E-05             | 0.036907             | -3.70121                         | 1.36E-04             | 0.024426             | -4.28355                         | 2.20E-06             | 0.026087             | -4.16963                         | 4.31E-06             |
| ENSMUSG00000000567 | Sox9     | 3.331081             | 5.38471                          | 6.25E-49             | 0.131949             | -2.61208                         | 1.57E-02             | 0.072699             | -3.59842                         | 1.42E-07             | 0.0692               | -3.60175                         | 1.69E-06             | 0.069207             | -3.64434                         | 5.88E-08             | 0.069566             | -3.61424                         | 1.03E-07             |
| ENSMUSG00000010175 | Prox1    | 1.844958             | 5.378209                         | 1.86E-48             | 0.02639              | -3.84812                         | 7.69E-04             | 0.049742             | -3.2551                          | 1.06E-06             | 0.02768              | -3.94831                         | 4.97E-07             | 0.048852             | -3.25567                         | 9.60E-07             | 0.056522             | -3.03235                         | 4.07E-06             |
| ENSMUSG00000020926 | Adam11   | 1.062967             | 5.245173                         | 2.63E-33             | 0.02639              | -3.05718                         | 2.97E-02             | 0.015305             | -3.97176                         | 6.57E-06             | 0.04152              | -2.62638                         | 3.07E-03             | 0.008142             | -4.60834                         | 8.79E-07             | 0.047827             | -2.45605                         | 2.52E-03             |
| ENSMUSG00000021336 | Slc17a4  | 1.611376             | 5.213044                         | 5.71E-37             | 0.046182             | -2.9795                          | 2.06E-02             | 0.061221             | -2.78128                         | 1.67E-04             | 0.046133             | -3.10218                         | 2.53E-04             | 0.036639             | -3.45774                         | 1.03E-05             | 0.021739             | -4.09194                         | 7.98E-07             |
| ENSMUSG00000031640 | Klkb1    | 1.31686              | 5.185563                         | 1.27E-41             | 0.072572             | -2.08788                         | 7.25E-02             | 0.038263             | -3.13143                         | 8.45E-06             | 0.023067             | -3.69895                         | 6.53E-06             | 0.024426             | -3.6884                          | 5.67E-07             | 0.030435             | -3.37841                         | 2.98E-06             |
| ENSMUSG00000078650 | G6pc     | 2.853761             | 5.178317                         | 9.83E-36             | 0.151741             | -2.20548                         | 1.17E-01             | 0.088005             | -3.12005                         | 4.86E-05             | 0.059973             | -3.58941                         | 5.63E-05             | 0.061065             | -3.60887                         | 6.64E-06             | 0.052174             | -3.79922                         | 3.18E-06             |
| ENSMUSG00000045991 | Onecut2  | 2.342589             | 5.166948                         | 4.19E-41             | 0.112156             | -2.34052                         | 4.96E-02             | 0.057394             | -3.42888                         | 1.98E-06             | 0.04152              | -3.79439                         | 4.30E-06             | 0.097704             | -2.65876                         | 1.33E-04             | 0.026087             | -4.41601                         | 1.50E-08             |
| ENSMUSG00000025194 | Abcc2    | 1.299934             | 5.166948                         | 2.26E-36             | 0.052779             | -2.496                           | 5.25E-02             | 0.045915             | -2.86612                         | 1.13E-04             | 0.023067             | -3.68183                         | 3.78E-05             | 0.020355             | -3.89708                         | 1.67E-06             | 0.039131             | -3.03235                         | 7.92E-05             |
| ENSMUSG00000027801 | Tm4sf4   | 16.20855             | 5.097764                         | 2.46E-50             | 0.567379             | -2.87348                         | 4.20E-03             | 0.428544             | -3.40362                         | 4.86E-08             | 0.309093             | -3.8247                          | 4.88E-08             | 0.744989             | -2.57157                         | 1.74E-05             | 0.317395             | -3.80238                         | 1.29E-09             |
| ENSMUSG00000035186 | Ubd      | 1.323631             | 5.055439                         | 1.94E-24             | 0.039585             | -2.90296                         | 1.14E-01             | 0.049742             | -2.7938                          | 3.60E-03             | 0.036907             | -3.12416                         | 4.75E-03             | 0.04071              | -3.04313                         | 2.53E-03             | 0.026087             | -3.59479                         | 4.64E-04             |
| ENSMUSG00000024843 | Chka     | 7.819915             | 5.024614                         | 5.94E-30             | 0.310079             | -2.6843                          | 9.03E-02             | 0.244882             | -3.15174                         | 1.75E-04             | 0.17992              | -3.5424                          | 2.65E-04             | 0.223904             | -3.26309                         | 1.66E-04             | 0.256525             | -3.04734                         | 4.64E-04             |
| ENSMUSG00000029822 | Osbpl3   | 2.21395              | 5.007585                         | 2.91E-40             | 0.072572             | -2.87037                         | 1.26E-02             | 0.038263             | -3.91248                         | 1.43E-07             | 0.101493             | -2.50003                         | 8.44E-04             | 0.089562             | -2.71528                         | 7.41E-05             | 0.043479             | -3.68973                         | 4.03E-07             |
| ENSMUSG00000003617 | Cp       | 46.4828              | 4.998857                         | 3.90E-15             | 2.51362              | -2.2562                          | 1.06E-02             | 1.35833              | -3.27498                         | 3.46E-09             | 1.134879             | -3.48874                         | 1.21E-08             | 1.343424             | -3.27361                         | 1.05E-09             | 1.260884             | -3.34934                         | 7.92E-10             |
| ENSMUSG00000027690 | Slc2a2   | 3.842253             | 4.920625                         | 7.29E-50             | 0.20452              | -2.24625                         | 1.89E-02             | 0.153051             | -2.7928                          | 1.67E-06             | 0.04152              | -4.54012                         | 6.35E-10             | 0.1262               | -3.05201                         | 2.00E-07             | 0.12174              | -3.08358                         | 2.03E-07             |
| ENSMUSG00000052562 | Slc22a30 | 1.838188             | 4.900161                         | 3.68E-31             | 0.158338             | -1.51884                         | 4.19E-01             | 0.045915             | -3.40603                         | 2.64E-05             | 0.02768              | -3.98943                         | 2.90E-05             | 0.065136             | -2.90052                         | 3.15E-04             | 0.039131             | -3.569                           | 2.02E-05             |
| ENSMUSG00000020429 | Igfbp1   | 2.48477              | 4.851906                         | 2.62E-33             | 0.184728             | -1.75316                         | 2.49E-01             | 0.068873             | -3.29569                         | 1.62E-05             | 0.05536              | -3.52974                         | 5.09E-05             | 0.069207             | -3.26665                         | 2.29E-05             | 0.08261              | -2.99716                         | 9.57E-05             |
| ENSMUSG00000027513 | Pck1     | 34.1605              | 4.851252                         | 3.90E-15             | 1.827487             | -2.28728                         | 1.79E-02             | 1.415725             | -2.7734                          | 1.61E-06             | 0.95496              | -3.30534                         | 4.45E-07             | 1.025887             | -3.23222                         | 2.57E-08             | 0.860879             | -3.47164                         | 4.39E-09             |
| ENSMUSG00000024479 | Mal2     | 1.056196             | 4.797863                         | 5.84E-38             | 0.052779             | -2.23018                         | 4.73E-02             | 0.03061              | -3.14476                         | 6.79E-06             | 0.032293             | -2.99478                         | 1.01E-04             | 0.044781             | -2.60834                         | 1.17E-04             | 0.030435             | -3.0961                          | 1.22E-05             |
| ENSMUSG00000015970 | Chdh     | 1.093434             | 4.78058                          | 2.24E-37             | 0.059377             | -2.12737                         | 6.83E-02             | 0.03061              | -3.19797                         | 6.49E-06             | 0.036907             | -2.87391                         | 1.93E-04             | 0.056994             | -2.32787                         | 6.05E-04             | 0.017391             | -3.83921                         | 4.45E-07             |
| ENSMUSG00000053646 | Plxnb1   | 1.029114             | 4.760509                         | 1.65E-34             | 0.065974             | -1.89837                         | 1.29E-01             | 0.026784             | -3.2852                          | 1.06E-05             | 0.02768              | -3.15803                         | 1.28E-04             | 0.020355             | -3.5999                          | 2.83E-06             | 0.056522             | -2.22933                         | 1.66E-03             |
| ENSMUSG00000022037 | Clu      | 148.6901             | 4.752316                         | 3.90E-15             | 7.395716             | -2.41073                         | 7.84E-03             | 4.844074             | -3.14568                         | 7.06E-08             | 4.553358             | -3.18868                         | 5.20E-07             | 4.763048             | -3.15337                         | 2.88E-08             | 6.687031             | -2.63428                         | 3.13E-06             |
| ENSMUSG00000060961 | Slc4a4   | 2.234262             | 4.745106                         | 2.38E-43             | 0.125351             | -2.16122                         | 3.44E-02             | 0.065047             | -3.23173                         | 4.49E-07             | 0.050747             | -3.50436                         | 1.26E-06             | 0.061065             | -3.29676                         | 2.12E-07             | 0.126088             | -2.24827                         | 2.19E-04             |
| ENSMUSG00000030236 | Slco1b2  | 2.718352             | 4.718323                         | 1.61E-36             | 0.20452              | -1.75664                         | 1.76E-01             | 0.114788             | -2.71865                         | 5.62E-05             | 0.0692               | -3.37297                         | 1.92E-05             | 0.101775             | -2.8717                          | 3.15E-05             | 0.052174             | -3.77865                         | 2.38E-07             |
| ENSMUSG00000054889 | Dsp      | 1.553827             | 4.701257                         | 1.09E-38             | 0.098961             | -1.95983                         | 8.18E-02             | 0.061221             | -2.78412                         | 1.96E-05             | 0.02768              | -3.76823                         | 2.03E-06             | 0.089562             | -2.22209                         | 5.98E-04             | 0.026087             | -3.86955                         | 8.00E-08             |
| ENSMUSG00000027792 | Bche     | 1.597836             | 4.698395                         | 1.53E-40             | 0.079169             | -2.30943                         | 2.80E-02             | 0.072699             | -2.58327                         | 3.55E-05             | 0.073813             | -2.50195                         | 3.47E-04             | 0.032568             | -3.6566                          | 7.60E-08             | 0.052174             | -3.00127                         | 4.31E-06             |
| ENSMUSG00000059434 | Gckr     | 1.543672             | 4.670122                         | 4.42E-31             | 0.065974             | -2.50886                         | 5.71E-02             | 0.057394             | -2.86874                         | 1.26E-04             | 0.036907             | -3.39449                         | 9.97E-05             | 0.073278             | -2.50345                         | 9.98E-04             | 0.065218             | -2.646                           | 5.04E-04             |
