# Supplementary material for: Single-Cell Transcriptomes Reveal Characteristic Features of Mouse Hepatocytes with Liver Cholestatic Injury
Source: MDPI journal article supplement (doi:10.3390/cells8091069), 2019-09-11
Supplement: s1 [file s1]

# Single-cell transcriptomes reveal characteristic features of Mouse Hepatocytes with Cholestasis Injury

Na Chang, Lei Tian, Xiaofang Ji, Xuan Zhou, Lei Hou, Xinhao Zhao, Yuanru Yang, Lin Yang, Liying Li

Supplemental Table 2: Top10 gene among state (Related to Figure 3)

| State | gene               | symbol  | log2Mean |
|-------|--------------------|---------|----------|
| 1     | ENSMUSG00000074115 | Saa1    | 8.00     |
| 1     | ENSMUSG00000057465 | Saa2    | 7.93     |
| 1     | ENSMUSG00000029368 | Alb     | 6.94     |
| 1     | ENSMUSG00000005681 | Apoa2   | 6.77     |
| 1     | ENSMUSG00000066154 | Mup3    | 6.76     |
| 1     | ENSMUSG00000031722 | Hp      | 6.56     |
| 1     | ENSMUSG00000030895 | Hpx     | 6.38     |
| 1     | ENSMUSG00000078672 | Mup20   | 6.22     |
| 1     | ENSMUSG00000032083 | Apoa1   | 6.17     |
| 1     | ENSMUSG00000002985 | Apoe    | 6.08     |
| 2     | ENSMUSG00000049775 | Tmsb4x  | 7.21     |
| 2     | ENSMUSG00000050708 | Ftl1    | 7.03     |
| 2     | ENSMUSG00000002985 | Apoe    | 6.41     |
| 2     | ENSMUSG00000024661 | Fth1    | 6.18     |
| 2     | ENSMUSG00000092341 | Malat1  | 6.09     |
| 2     | ENSMUSG00000064351 | mt-Co1  | 5.85     |
| 2     | ENSMUSG00000064357 | mt-Atp6 | 5.73     |
| 2     | ENSMUSG00000064358 | mt-Co3  | 5.66     |
| 2     | ENSMUSG00000029580 | Actb    | 5.16     |
| 2     | ENSMUSG00000034892 | Rps29   | 5.16     |
